# Supplementary material for: Cyanobacteria and Macroinvertebrate Relationships in Freshwater Benthic Communities beyond Cytotoxicity
Source: MDPI journal article supplement (doi:10.3390/toxins16040190), 2024-04-15
Supplement: s1 [file s1]

**Table S1 (Suppl. Mat.).** Compilation of data regarding the relationships between cyanobacteria and benthic macroinvertebrates. Species and associated data are grouped in families, which is the most used taxonomic level in scientific studies. Parameters influencing the relationships between macroinvertebrates and cyanobacteria have been organized into columns, including the life cycle stage (if known, the substage or size of larval or juvenile stage is indicated), the origin of the macroinvertebrate specimens analyzed (lakes, rivers, etc.), the type of assay conducted (field observations or laboratory trials), the cyanobacteria associated with and their toxicity if explicitly indicated in the study (denoted with the signs + and -), the type of cyanotoxin used, aspects of the relationships studied simplified into topics and bibliographic references where the indicated information can be found (**A**, adult; **ANTX**, anatoxins; **BMAA**,  $\beta$ -N-methylamino-L-alanine; **CB**, cell-bound toxins; **CF**, cell-free toxins; **Co**, Cohabiting; **CYN**, Cyindrospermopsin; **EX**, extracts; **F**, feeding; **J**, juvenile; **L**, larva; **Lab**, laboratory assays; **MC**, microcystins; **Nat**, nature observations; **NOD**, nodularins; **NS**, not studied; **P**, pupa; **PST**, paralytic shellfish toxins; **U**, unknow).

| Macroinvertebrate taxa                                     | Instar | Habitat       | Data    | Cyanobacteria                                                                                                                          | Toxins                                | Exposure | Research topics                                                                                                                                                                                                                                                                                                                                                                                                                         | References                    |
|------------------------------------------------------------|--------|---------------|---------|----------------------------------------------------------------------------------------------------------------------------------------|---------------------------------------|----------|-----------------------------------------------------------------------------------------------------------------------------------------------------------------------------------------------------------------------------------------------------------------------------------------------------------------------------------------------------------------------------------------------------------------------------------------|-------------------------------|
| <b>Arthropoda, Hexapoda, Diptera, Chaoboridae</b>          |        |               |         |                                                                                                                                        |                                       |          |                                                                                                                                                                                                                                                                                                                                                                                                                                         |                               |
| <i>Chaoborus</i> sp.                                       | L (4)  | Unknow        | Lab     | <i>Microcystis aeruginosa</i> (+)                                                                                                      | NS                                    | F, CB    | Survival/Mortality test; forced feeding on prey toxins accumulated; Toxins food web transfer                                                                                                                                                                                                                                                                                                                                            | [138]                         |
| <b>Arthropoda, Hexapoda, Diptera, Chironomidae</b>         |        |               |         |                                                                                                                                        |                                       |          |                                                                                                                                                                                                                                                                                                                                                                                                                                         |                               |
| <i>Chaetocladius</i> sp.                                   | L      | Streams       | Nat     | <i>Chamaesiphon curvatus</i> , <i>C. polonicus</i> , <i>Phormidium</i> sp.                                                             | NS                                    | F, Co    | Wild feeding on cyanobacteria; Gut content analysis; Tolerance to habitats abundant in cyanobacteria                                                                                                                                                                                                                                                                                                                                    | [139]                         |
| Chironomidae                                               | L      | Water bodies  | Nat     | <i>Oscillatoria</i> sp.; Cyanobacteria sediments; Cyanobacteria blooms ( <i>Microcystis</i> sp.); Metaphyton ( <i>Lyngbya Wollei</i> ) | NS; MCs                               | F, Co    | Wild feeding on cyanobacteria; Gut contents and food selection analysis; colonies, mats or mass of cyanobacteria; Paleoecological sediment studies: cyanotoxins conditioned chironomids community; Food assimilation analysis (cyanobacteria cells survival to intestinal transit); Cyanobacteria bloom; Abundance of macroinvertebrates and cyanobacteria; Cyanobacteria determine the distribution and abundance of midge populations | [139,140,141,142,143,144,145] |
| <i>Chironomus</i> spp.                                     | L      | Lakes; Rivers | Lab+Nat | <i>Planktothrix agardhii</i> , <i>Dolichospermum</i> spp., <i>Cuspidothrix issatschenkoi</i> ; <i>Anabaena</i> sp.                     | MC-LA, -LR - RR, -YR, ANTX-a extracts | F, CF    | Wild feeding on cyanobacteria; Gut contents analysis; Toxins bioaccumulation; Survival/mortality; Tolerance habitats abundant in cyanobacteria; Effects of single toxins, mixture, or extracts                                                                                                                                                                                                                                          | [90,124]                      |
| <i>Chironomus balatonicus</i> Dévai, Wülker & Scholl, 1983 | L      | Streams       | Nat     | <i>Anabaena</i> spp., <i>Chroococcales</i> sp., <i>Microcystis</i> spp., <i>Oscillatoria</i> spp., <i>Woronichinia compacta</i>        | NS                                    | F        | Wild feeding on cyanobacteria; Gut content analysis; Food assimilation analysis (midge mouthpart and algal morphology)                                                                                                                                                                                                                                                                                                                  | [146]                         |

|                                                             |         |                |     |                                                                                                                                                                          |                 |       |                                                                                                                                                                                                                                                                                                              |                       |
|-------------------------------------------------------------|---------|----------------|-----|--------------------------------------------------------------------------------------------------------------------------------------------------------------------------|-----------------|-------|--------------------------------------------------------------------------------------------------------------------------------------------------------------------------------------------------------------------------------------------------------------------------------------------------------------|-----------------------|
| <i>Chironomus crassicaudatus</i> Malloch, 1915              | L (4)   | Lakes          | Lab | <i>Anabaena</i> sp., <i>Anabaena flos-aquae</i> , <i>Lyngbya</i> sp., <i>Lyngbya aeruginosa</i> , <i>Microcystis</i> sp., <i>Anacystis</i> sp., <i>Gloeocapsa</i> sp.    | NS              | F     | Forced feeding on cyanobacteria; Food selection analysis; Digestibility; Territorial distribution conditioned by cyanobacteria                                                                                                                                                                               | [88,147,148]          |
| <i>Chironomus decorus</i> Johansen, 1905                    | L       | Lakes          | Nat | Not identified                                                                                                                                                           | NS              | F     | Wild feeding on cyanobacteria; Gut contents analysis; Territorial distribution conditioned by cyanobacteria                                                                                                                                                                                                  | [148,149]             |
| <i>Chironomus dilutus</i> Shobanov, Kiknadze & Butler, 1999 | L       | Water bodies   | Lab | <i>Phormidium</i> sp (strain 1 (+): <i>P. cf. subfuscum</i> ; strain 2 (+): <i>P. cf. irriguum</i> ; strain 3 (+): <i>P. cf. autumnale</i> )                             | ANTX            | CF    | Survival/mortality; Harmful effect of cyanobacteria extracts                                                                                                                                                                                                                                                 | [150]                 |
| <i>Chironomus pallidivittatus</i> Malloch, 1915             | L (1-4) | Lakes          | Lab | <i>Microcystis aeruginosa</i> (+); <i>M. wesenbergii</i> (-)                                                                                                             | MC-LR           | F, CF | Survival/mortality; Harmful effect of single toxins, mixture or extracts on behavior, immature growth, cell and tissue and metabolism; Metabolic detoxification processes (oxidative stress)                                                                                                                 | [31,151]              |
| <i>Chironomus plumosus</i> (Linnaeus, 1758)                 | L       | Streams        | Nat | <i>Aphanizomenon flos-aquae</i> , <i>Chroococcales</i> spp., <i>Microcystis</i> spp., <i>Oscillatoria</i> spp., <i>Snowella lacustris</i> , <i>Woronichinia compacta</i> | NS              | F     | Wild feeding on cyanobacteria; Gut content analysis; Food assimilation analysis (midge mouthpart and algal morphology)                                                                                                                                                                                       | [146]                 |
| <i>Chironomus riparius</i> Meigen, 1804                     | L       | Stock culture  | Lab | <i>Anabaena</i> sp., <i>Spirulina</i> sp. <i>Trichormus variabilis</i> (+)                                                                                               | MC-LR; extracts | F, CF | Forced feeding on cyanobacteria; Food assimilation analysis (isotope labeling); Life cycle conclusion; Survival/mortality; Toxicity synergies; Harmful effect on immature growth, life cycle, molecular, tissue and metabolism; Metabolic detoxification processes (oxidative stress: CAT, GST, GSH and LPO) | [100,102,152,153,154] |
| <i>Cladotanytarsus mancus</i> (Walker, 1856)                | L       | Streams; Lakes | Nat | <i>Chroococcus</i> sp, <i>Kamptonema formosum</i> , <i>Leptolyngbya boryana</i> and <i>Oscillatoria princeps</i>                                                         | NS              | F     | Gut contents analysis                                                                                                                                                                                                                                                                                        | [92]                  |
| <i>Conchapelopia melanops</i> (Meigen, 1818)                | L (4)   | Rivers         | Nat | Not identified                                                                                                                                                           | NS              | Co    | Metabolic detoxification processes (oxidative stress: CAT, GST, GSH and LPO)                                                                                                                                                                                                                                 | [154]                 |
| <i>Cricotopus</i> sp.                                       | L       | Streams        | Nat | <i>Nostoc parmelioides</i> ; <i>N. verrucosum</i>                                                                                                                        | NS              | F, Co | Macroinvertebrate-cyanobacteria mutualism; Inhabit exclusively cyanobacteria; Wild feeding on cyanobacteria                                                                                                                                                                                                  | [96,117]              |
| <i>Cricotopus cataractaenostocicola</i> (Tachibana, 2022)   | L       | Streams        | Nat | <i>Nostoc</i> sp.                                                                                                                                                        | NS              | F, Co | Macroinvertebrate-cyanobacteria mutualism; Inhabit exclusively cyanobacteria; Wild feeding on cyanobacteria                                                                                                                                                                                                  | [114]                 |
| <i>Cricotopus fuscatus</i> Wirth, 1957                      | L       | Streams        | Nat | <i>Nostoc parmelioides</i>                                                                                                                                               | NS              | F, Co | Macroinvertebrate-cyanobacteria mutualism; Inhabit exclusively cyanobacteria; Wild feeding on cyanobacteria                                                                                                                                                                                                  | [93,155]              |
| <i>Cricotopus levantinus</i> Moubayed & Hirvenoja, 1986     | L       | Streams        | Nat | <i>Nostoc parmelioides</i>                                                                                                                                               | NS              | F, Co | Macroinvertebrate-cyanobacteria mutualism; Inhabit exclusively cyanobacteria; Wild feeding on cyanobacteria                                                                                                                                                                                                  | [116]                 |

|                                                            |   |                |     |                                                                                                                          |       |       |                                                                                                                                                                                                                                                  |                  |
|------------------------------------------------------------|---|----------------|-----|--------------------------------------------------------------------------------------------------------------------------|-------|-------|--------------------------------------------------------------------------------------------------------------------------------------------------------------------------------------------------------------------------------------------------|------------------|
| <i>Cricotopus lygropis</i><br>Edwards 1929                 | L | Streams        | Nat | <i>Nostoc parmelioides</i>                                                                                               | NS    | F, Co | Macroinvertebrate-cyanobacteria mutualism; Inhabit exclusively cyanobacteria; Wild feeding on cyanobacteria; Gut contents analysis                                                                                                               | [85]             |
| <i>Cricotopus nostocicola</i><br>Wirth, 1957               | L | Streams        | Nat | <i>Nostoc parmelioides</i>                                                                                               | NS    | F, Co | Macroinvertebrate-cyanobacteria mutualism; Inhabit exclusively cyanobacteria; Wild feeding on cyanobacteria                                                                                                                                      | [93,115,155,156] |
| <i>Cricotopus sylvestris</i><br>(Fabricius, 1794)          | L | Lakes          |     | <i>Microcistis</i> sp., <i>Oscillatoria</i> sp., <i>Planktothrix</i> sp.                                                 | NS    | F     | Wild feeding on cyanobacteria; Gut contents analysis                                                                                                                                                                                             | [157]            |
| <i>Cryptochironomus defectus</i> (Kieffer, 1913)           | L | Streams; Lakes | Nat | <i>Chroococcus</i> sp, <i>Kamptonema formosum</i> , <i>Leptolyngbya boryana</i> and <i>Oscillatoria princeps</i>         | NS    | F     | Gut contents analysis                                                                                                                                                                                                                            | [92]             |
| <i>Cryptochironomus fulvus</i> Johannsen, 1905             | L | Lakes          | Nat | Cyanobacteria                                                                                                            | NS    | Co    | Tolerance habitats abundant in cyanobacteria; Territorial distribution conditioned by cyanobacteria                                                                                                                                              | [148]            |
| <i>Diamesa</i> sp.                                         | L | Streams        | Nat | <i>Chamaesiphon curvatus</i> , <i>C.</i> , <i>Phormidium</i> sp.                                                         | NS    | F, Co | Wild feeding on cyanobacteria; Gut content analysis; Tolerance to habitats abundant in cyanobacteria                                                                                                                                             | [139]            |
| <i>Diamesa latitarsis</i><br>(Goetghebuer, 1921)           | L | Streams        | Nat | <i>Chamaesiphon curvatus</i> , <i>C.</i> , <i>Phormidium</i> sp.                                                         | NS    | F, Co | Wild feeding on cyanobacteria; Gut content analysis; Tolerance to habitats abundant in cyanobacteria                                                                                                                                             | [139]            |
| <i>Diamesa nowickiana</i><br>Kownacki, 1975                | L | Streams        | Nat | <i>Chamaesiphon curvatus</i> , <i>C.</i> , <i>Phormidium</i> sp.                                                         | NS    | F, Co | Wild feeding on cyanobacteria; Gut content analysis; Tolerance to habitats abundant in cyanobacteria                                                                                                                                             | [139]            |
| <i>Diamesa steinboecki</i><br>Goetghebuer, 1933            | L | Streams        | Nat | <i>Chamaesiphon curvatus</i> , <i>C.</i> , <i>Phormidium</i> sp.                                                         | NS    | F, Co | Wild feeding on cyanobacteria; Gut content analysis; Tolerance to habitats abundant in cyanobacteria                                                                                                                                             | [139]            |
| <i>Diamesa ursus</i> (Kieffer, 1918)                       | L | Streams        | Nat | <i>Chamaesiphon curvatus</i> , <i>C.</i> , <i>Phormidium</i> sp.                                                         | NS    | F, Co | Wild feeding on cyanobacteria; Gut content analysis; Tolerance to habitats abundant in cyanobacteria                                                                                                                                             | [139]            |
| <i>Glyptotendipes</i> sp                                   | L | Lakes          |     | <i>Oscillatoria</i> sp., <i>Planktothrix</i> sp.                                                                         | NS    | F     | Wild feeding on cyanobacteria; Gut contents analysis                                                                                                                                                                                             | [157]            |
| <i>Glyptotendipes paripes</i><br>(Edwards, 1929)           | L | Lakes          | Lab | Cyanobacteria, <i>Anabaena flos-aquae</i> , <i>Lyngbya aeruginosa</i> , <i>Microcystis</i> sp.                           | NS    | F, Co | Forced feeding on cyanobacteria; Food selection, gut contents sand food assimilation analysis (algal morphology); Digestibility; Life cycle conclusion; Harmful effect on immature growth; Territorial distribution conditioned by cyanobacteria | [89,148,149]     |
| <i>Glyptotendipes tokunagai</i> Sasa, 1979                 | L | Stock culture  | Lab | <i>Microcystis aeruginosa</i> (+); <i>M. wesenbergii</i> (-)                                                             | MC-LR | Co    | Bio flocculation (large algal aggregates); Natural water detoxification; Midge silk                                                                                                                                                              | [158]            |
| <i>Endochironomus albipennis</i> (Meigen, 1830)            | L | Lakes          |     | <i>Limnothrix</i> sp., <i>Microcystis</i> sp., <i>Oscillatoria</i> sp., <i>Planktothrix</i> sp., <i>Anabaena</i> sp.     | NS    | F     | Wild feeding on cyanobacteria; Gut contents analysis                                                                                                                                                                                             | [157]            |
| <i>Labrundinia</i> sp                                      | L | Rivers         | Nat | <i>Anabaena</i> sp.                                                                                                      | NS    | F     | Wild feeding on cyanobacteria; Gut contents analysis                                                                                                                                                                                             | [159]            |
| <i>Micropsectra</i> sp.                                    | L | Streams        | Nat | <i>Nostoc parmelioides</i>                                                                                               | NS    | Co    | Tolerance to habitats abundant in cyanobacteria                                                                                                                                                                                                  | [112]            |
| <i>Omisus</i> sp.                                          | L | Rivers         | Nat | <i>Anabaena</i> sp.                                                                                                      | NS    | F     | Wild feeding on cyanobacteria; Gut contents analysis                                                                                                                                                                                             | [159]            |
| <i>Orthocladius rivicola</i><br>Kieffer, 1911              | L | Streams        | Nat | <i>Chamaesiphon curvatus</i> , <i>C. polonicus</i> , <i>Phormidium</i> sp.                                               | NS    | F, Co | Wild feeding on cyanobacteria; Gut content analysis; Tolerance to habitats abundant in cyanobacteria                                                                                                                                             | [139]            |
| <i>Orthocladius thienemanni</i> Kieffer & Thienemann, 1906 | L | Streams        | Nat | <i>Chamaesiphon curvatus</i> , <i>C. polonicus</i> , <i>Phormidium</i> sp.; <i>Tolypothrix tenuis</i> , <i>Calothrix</i> | NS    | F, Co | Wild feeding on cyanobacteria; Gut content analysis; Tolerance to habitats abundant in cyanobacteria                                                                                                                                             | [139,160]        |

|                                                       |       |                                 |         |                                                                                                                                                                                                                             |                 |       |                                                                                                      |           |
|-------------------------------------------------------|-------|---------------------------------|---------|-----------------------------------------------------------------------------------------------------------------------------------------------------------------------------------------------------------------------------|-----------------|-------|------------------------------------------------------------------------------------------------------|-----------|
|                                                       |       |                                 |         | <i>gypsophila, Coelosphaerium kuetzingianum, Gomphosphaeria lacustris</i>                                                                                                                                                   |                 |       |                                                                                                      |           |
| <i>Pagastia partica</i> (Roback, 1957)                | L     | Rivers                          | Nat     | <i>Nostoc</i> sp.                                                                                                                                                                                                           | NS              | F, Co | Wild feeding on cyanobacteria; Gut content analysis; Tolerance to habitats abundant in cyanobacteria | [161]     |
| <i>Parakiefferiella</i> sp.                           | L     | Rivers                          | Nat     | <i>Anabaena</i> sp.                                                                                                                                                                                                         | NS              | F     | Wild feeding on cyanobacteria; Gut contents analysis                                                 | [159]     |
| <i>Parametriocnemus</i> sp.                           | L     | Rivers                          | Nat     | <i>Anabaena</i> sp.                                                                                                                                                                                                         | NS              | F     | Wild feeding on cyanobacteria; Gut contents analysis                                                 | [159]     |
| <i>Paratanytarsus</i> sp.                             | L (4) | Rivers                          | Nat     | Not identified                                                                                                                                                                                                              | NS              | Co    | Metabolic detoxification processes (oxidative stress: CAT, GST, GSH and LPO)                         | [154]     |
| <i>Polypedilum scalaenum</i> (Schränk, 1803)          | L     | Streams; Lakes                  | Nat     | <i>Chroococcus</i> sp., <i>Kamptomena formosum</i> , <i>Leptolyngbya boryana</i> and <i>Oscillatoria princeps</i>                                                                                                           | NS              | F     | Gut contents analysis                                                                                | [92]      |
| <i>Polypedilum</i> sp.                                | L     | Rivers                          | Nat     | <i>Anabaena</i> sp.                                                                                                                                                                                                         | NS              | F     | Wild feeding on cyanobacteria; Gut contents analysis                                                 | [159]     |
| <i>Prodiamesa olivacea</i> (Meigen, 1818)             | L (4) | Rivers                          | Nat     | Not identified                                                                                                                                                                                                              | NS              | Co    | Metabolic detoxification processes (oxidative stress: CAT, GST, GSH and LPO)                         | [154]     |
| <i>Pseudodiamesa nivos</i> Goetgehebuier, 1928        | L     | Streams                         | Nat     | <i>Chamaesiphon curvatus</i> , <i>C. polonicus</i> , <i>Phormidium</i> sp.                                                                                                                                                  | NS              | F, Co | Wild feeding on cyanobacteria; Tolerance to habitats abundant in cyanobacteria                       | [139]     |
| <i>Pseudokiefferiella parva</i> (Edwards, 1932)       | L     | Streams                         | Nat     | <i>Chamaesiphon curvatus</i> , <i>C. polonicus</i> , <i>Phormidium</i> sp.                                                                                                                                                  | NS              | F, Co | Wild feeding on cyanobacteria; Tolerance to habitats abundant in cyanobacteria                       | [139]     |
| Tanypodinae                                           | L     | Lakes                           | Nat     | Cyanobacteria                                                                                                                                                                                                               | NS              | Co    | Tolerance habitats abundant in cyanobacteria; Territorial distribution conditioned by cyanobacteria  | [148]     |
| <i>Tanytarsus</i> sp.                                 | L     | Rivers                          | Nat     | <i>Anabaena</i> sp.                                                                                                                                                                                                         | NS              | F     | Wild feeding on cyanobacteria; Gut contents analysis                                                 | [159]     |
| <i>Tanytus chinensis</i> Wang, 1994                   | L     | Lakes                           | Nat     | <i>Microcystis</i> sp., <i>Oscillatoria</i> sp., <i>Dolichospermum</i> sp.                                                                                                                                                  | MC-LR, -RR, -YR | F, CF | Toxin bioaccumulation                                                                                | [97]      |
| <i>Tendipes decorus</i> (Johannsen, 1905)             | L     | Lakes                           | Nat     | <i>Microcystis</i> sp.                                                                                                                                                                                                      | NS              | F     | Wild feeding on cyanobacteria; Gut contents analysis                                                 | [149]     |
| <b>Arthropoda, Hexapoda, Diptera, Ceratopogonidae</b> |       |                                 |         |                                                                                                                                                                                                                             |                 |       |                                                                                                      |           |
| <i>Forcipomyia</i> spp.                               | L     | Unknow                          | Lab     | <i>Anabaena</i> sp.                                                                                                                                                                                                         | NS              | F     | Forced feeding on cyanobacteria; Life cycle conclusion                                               | [162]     |
| <i>Forcipomyia intonsa</i> Chan and LeRoux, 1971      | P     | Reservoir                       | Nat     | Cyanobacteria                                                                                                                                                                                                               | NS              | Co    | Tolerance to habitats abundant in cyanobacteria                                                      | [163]     |
| <i>Forcipomyia taiwana</i> (Shiraki, 1913)            | L     | Lakes                           | Lab     | <i>Anabaena</i> sp.                                                                                                                                                                                                         | NS              | F     | Forced feeding on cyanobacteria; Life cycle                                                          | [162]     |
| <b>Arthropoda, Hexapoda, Diptera, Ephydriidae</b>     |       |                                 |         |                                                                                                                                                                                                                             |                 |       |                                                                                                      |           |
| <i>Axysta cesta</i> (Haliday, 1833)                   | L     | water bodies shores and wetland | Nat     | <i>Lyngbya</i> sp., <i>Cylindrospermum</i>                                                                                                                                                                                  | NS              | F     | Wild and forced feeding on cyanobacteria; Trophic specialist                                         | [164]     |
| <i>Coenia curvicauda</i> (Meigen, 1830)               | L; A  | water bodies shores and wetland | Lab+Nat | <i>Anabaena flos-aquae</i> , <i>A. variabilis</i> , <i>Calothrix</i> sp., <i>Cylindrospermum</i> sp., <i>Gloeocapsa alpicola</i> , <i>Lyngbya spiralis</i> , <i>Oscillatoria tenuis</i> , <i>Synechococcus leopoliensis</i> | NS              | F     | Wild and forced feeding on cyanobacteria; Gut content analysis; Life cycle                           | [165,166] |

|                                                               |      |                                       |         |                                                                                                                                                                                                                                                                                                             |    |        |                                                                                                       |              |
|---------------------------------------------------------------|------|---------------------------------------|---------|-------------------------------------------------------------------------------------------------------------------------------------------------------------------------------------------------------------------------------------------------------------------------------------------------------------|----|--------|-------------------------------------------------------------------------------------------------------|--------------|
| <i>Dichaeta caudata</i><br>(Fallén, 1813)                     | L    | water bodies<br>shores and<br>wetland | Nat     | Filamentous cyanobacteria                                                                                                                                                                                                                                                                                   | NS | Co     | Tolerance habitats abundant in cyanobacteria                                                          | [166]        |
| <i>Discocerina obscurella</i><br>(Fallén, 1813)               | L    | Water bodies<br>shores and<br>wetland | Nat     | Unicellular and filamentous<br>cyanobacteria                                                                                                                                                                                                                                                                | NS | Co     | Tolerance habitats abundant in cyanobacteria                                                          | [166]        |
| <i>Ephydra bruesi</i><br>(Cresson, 1934)                      | L    | Spring                                | Lab+Nat | Cyanobacteria mats                                                                                                                                                                                                                                                                                          | NS | F      | Food assimilation analysis (isotope labeling)                                                         | [167]        |
| <i>Ephydra cinerea</i><br>(Jones, 1906)                       | L    | Lakes                                 | Nat     | Gelatinous blue-green algal masses.                                                                                                                                                                                                                                                                         | NS | Co     | Territorial distribution conditioned by cyanobacteria                                                 | [168]        |
| <i>Ephydra macellaria</i><br>Egger, 1862                      | L; A | Lakes                                 | Nat     | Cyanobacteria mats                                                                                                                                                                                                                                                                                          | NS | F, C o | Wild feeding on cyanobacteria; Inhabit colonies or mats<br>of cyanobacteria                           | [118]        |
| <i>Ephydra riparia</i> Fallén,<br>1813                        | L    | Water bodies<br>shores and<br>wetland | Lab     | <i>Gloeocapsa</i> sp., <i>Anabaena</i> sp.                                                                                                                                                                                                                                                                  | NS | F      | Forced feeding on cyanobacteria; Life cycle                                                           | [169]        |
| <i>Ephydra termophila</i><br>Cresson, 1934                    | L    | Alkaline hot<br>spring                | Lab     | <i>Phormidium</i> sp., <i>Mastigocladus</i> sp.,<br><i>Oscillatoria</i> sp.                                                                                                                                                                                                                                 | NS | F      | Forced feeding on cyanobacteria; Life cycle                                                           | [170]        |
| <i>Hyadina albovenosa</i><br>Coquillett, 1900                 | L; A | Wetland                               | Lab+Nat | <i>Anabaena flos-aquae</i> , <i>A. variabilis</i> ,<br><i>Cylindrospermum</i> sp., <i>Gloeocapsa</i><br><i>alpicola</i> , <i>Lyngbya spiralis</i> , <i>Nostoc</i><br><i>commune</i> , <i>Oscillatoria tenuis</i> ,<br><i>Spirulina</i> sp., <i>Symploca muscorum</i> ,<br><i>Synechococcus leopoliensis</i> | NS | F      | Food selection analysis; forced feeding on<br>cyanobacteria; Life cycle                               | [86]         |
| <i>Hyadina binotata</i><br>(Cresson, 1926)                    | L    | Wetland                               | Nat     | <i>Anabaena</i> sp., <i>Cylindrospermum</i> sp.,<br><i>Lyngbya</i> sp., <i>Phormidium</i> sp.                                                                                                                                                                                                               | NS | F      | Trophic specialist; Inhabit colonies or mats of<br>cyanobacteria; Wild feeding study on cyanobacteria | [83,164]     |
| <i>Hyadina neglecta</i><br>Sturtevant & Wheeler,<br>1954      | L    | Wetland                               | Nat     | <i>Cylindrospermum</i> sp                                                                                                                                                                                                                                                                                   | NS | F      | Trophic specialist; Wild feeding study on cyanobacteria                                               | [164]        |
| <i>Hyadina subnitida</i><br>Sturtevant & Wheeler<br>1954      | L    | Wetland                               | Nat     | <i>Anabaena</i> sp., <i>Anacystis</i> sp.,<br><i>Cylindrospermum</i> sp., <i>Lyngbya</i> sp.,<br><i>Phormidium</i> sp.                                                                                                                                                                                      | NS | F      | Trophic specialist; Inhabit colonies or mats of<br>cyanobacteria; Wild feeding study on cyanobacteria | [83,164]     |
| <i>Hydrellia formosa</i><br>Loew, 1861                        | L    | Water bodies<br>shores                | Nat     | <i>Nostoc</i> sp., <i>Aphanocapsa</i> sp.                                                                                                                                                                                                                                                                   | NS | Co     | Inhabit colonies, mats or mass of cyanobacteria                                                       | [166]        |
| <i>Hydrellia harti</i> Cresson,<br>1936                       | L    | Water bodies<br>shores                | Nat     | <i>Nostoc</i> sp., <i>Aphanocapsa</i> sp.                                                                                                                                                                                                                                                                   | NS | Co     | Inhabit colonies, mats or mass of cyanobacteria                                                       | [166]        |
| <i>Lytogaster abdominalis</i><br>(Stenhammar, 1844)           | L    | Water bodies<br>shores and<br>wetland | Nat     | <i>Cylindrospermum</i> sp.                                                                                                                                                                                                                                                                                  | NS | F      | Trophic specialist; Wild feeding study on cyanobacteria                                               | [164]        |
| <i>Lytogaster excavata</i><br>(Sturtevant & Wheeler,<br>1954) | L    | Water bodies<br>shores and<br>wetland | Lab+Nat | <i>Anabaena variabilis</i> ; <i>A. flos-aquae</i> ,<br><i>Anabaena</i> sp., <i>Anacystis nidulans</i> ,<br><i>Cylindrospermum</i> sp, <i>Gloeocapsa</i><br><i>alpicola</i> , <i>Lyngbya</i> sp., <i>Nostoc</i>                                                                                              | NS | F      | Trophic specialist; Wild and forced feeding on<br>cyanobacteria; Life cycle                           | [83,164,171] |

|                                                         |      |                                 |                                                                                                        |                                                                                                                                                                                                                                                   |    |       |                                                                                                                                                           |                 |
|---------------------------------------------------------|------|---------------------------------|--------------------------------------------------------------------------------------------------------|---------------------------------------------------------------------------------------------------------------------------------------------------------------------------------------------------------------------------------------------------|----|-------|-----------------------------------------------------------------------------------------------------------------------------------------------------------|-----------------|
|                                                         |      |                                 | <i>commune, Oscillatoria chalybea, Oscillatoria tenuis, Phormidium sp., Synechococcus leopoliensis</i> |                                                                                                                                                                                                                                                   |    |       |                                                                                                                                                           |                 |
| <i>Lytogaster flavipes</i> (Sturtevant & Wheeler, 1954) | L    | Water bodies shores and wetland | Nat                                                                                                    | <i>Cylindrospermum</i> sp                                                                                                                                                                                                                         | NS | F     | Trophic specialist; Wild feeding on cyanobacteria                                                                                                         | [164]           |
| <i>Lytogaster furva</i> (Cresson, 1926)                 | L    | Water bodies shores and wetland | Lab+Nat                                                                                                | <i>Cylindrospermum</i> sp                                                                                                                                                                                                                         | NS | F     | Trophic specialist; Inhabit colonies or mats of cyanobacteria; Wild feeding on cyanobacteria                                                              | [164]           |
| <i>Nostima approximata</i> Sturtevant & Wheeler, 1954   | L    | Wetland                         | Lab+Nat                                                                                                | <i>Anabaena flos-aquae, A. variabilis; Anabaena sp., Cylindrospermum sp, Gloeocapsa alpicola, Lyngbya spiralis., Nostoc commune, Oscillatoria limosa, O. tenuis, Phormidium sp., Scytonema sp., Symploca muscorum, Synechococcus leopoliensis</i> | NS | F     | Trophic specialist; Wild and forced feeding on cyanobacteria; Life cycle                                                                                  | [140]           |
| <i>Paracoenia turbida</i> (Curran, 1927)                | L; A | Alkaline hot spring             | Lab+Nat                                                                                                | Cyanobacteria mats formed mainly by <i>Phormidium</i> sp., <i>Mastigocladus</i> sp. and <i>Oscillatoria</i> sp.                                                                                                                                   | NS | F, Co | Wild and forced feeding on cyanobacteria; Gut contents and food assimilation (isotope labeling) analysis; Inhabit colonies, mats or mass of cyanobacteria | [167,172,173]   |
| <i>Parydra aquila</i> (Fallen, 1813)                    | L    | Water bodies shores and wetland | Nat                                                                                                    | <i>Oscillatoria</i> sp.                                                                                                                                                                                                                           | NS | F     | Wild feeding on cyanobacteria; Gut contents analysis                                                                                                      | [164, 166, 169] |
| <i>Parydra quadrituberculata</i> (Loew, 1862)           | L    | Water bodies shores and wetland | Nat                                                                                                    | <i>Oscillatoria</i> sp.                                                                                                                                                                                                                           | NS | F     | Wild feeding on cyanobacteria; Gut contents analysis                                                                                                      | [164,166,169]   |
| <i>Pelina truncatula</i> (Loew, 1878)                   | L    | Water bodies shores and wetland | Nat                                                                                                    | <i>Anabaena variabilis; A. flos-aquae, Anabaena sp., Cylindrospermum sp, Gloeocapsa alpicola, Gloeocapsa sp., Lyngbya spiralis., Nostoc commune, Oscillatoria sp., O. tenuis, Phormidium sp., Synechococcus leopoliensis</i>                      | NS | F     | Trophic specialist; Wild and forced feeding on cyanobacteria; Life cycle                                                                                  | [164,174]       |
| <i>Scatella picea</i> (Walker, 1849)                    | L    | Water bodies shores and wetland | Nat                                                                                                    | <i>Anabaena flos-aquae, A. variabilis, Cylindrospermum sp., Gloeocapsa sp., Lyngbya sp., Nostoc commune</i>                                                                                                                                       | NS | F     | Forced feeding on cyanobacteria; Life cycle                                                                                                               | [175]           |
| <i>Scatella stagnalis</i> Fallén, 1813                  | L; A | Water bodies shores and wetland | Lab+Nat                                                                                                | <i>Nostoc</i> sp., <i>Nostoc muscorum, N. commune, Gloeocapsa sp., Anabaena sp., Anabaena flos-aquae, Cylindrospermum sp.</i>                                                                                                                     | NS | F     | Trophic specialist; Wild and forced feeding on cyanobacteria; Life cycle                                                                                  | [164,176]       |

|                                                                          |        |                                       |         |                                                                                                                                                                                                                                                                                                                                                        |    |    |                                                                                                  |               |
|--------------------------------------------------------------------------|--------|---------------------------------------|---------|--------------------------------------------------------------------------------------------------------------------------------------------------------------------------------------------------------------------------------------------------------------------------------------------------------------------------------------------------------|----|----|--------------------------------------------------------------------------------------------------|---------------|
| <i>Setacera atrovirens</i><br>(Loew, 1862)                               | L      | Water bodies<br>shores and<br>wetland | Lab+Nat | <i>Anabaena variabilis</i> ; <i>Anabaena</i> sp.,<br><i>Anacystis</i> sp., <i>Cylindrospermum</i> sp.,<br><i>Gloeocapsa</i> sp., <i>Lyngbya</i> sp., <i>Nostoc</i><br>sp., <i>Nostoc commune</i> , <i>Oscillatoria</i><br>sp., <i>Oscillatoria chalybea</i> , <i>O. tenuis</i> ,<br><i>Phormidium</i> sp., <i>Synechococcus</i><br><i>leopoliensis</i> | NS | F  | Trophic specialist; Wild and forced feeding on<br>cyanobacteria; Life cycle                      | [164,169,177] |
| <i>Setacera pacifica</i><br>(Cresson, 1925)                              | L      | Highly alkaline<br>ponds              | Lab+Nat | <i>Anabaena</i> sp., <i>Oscillatoria</i> sp.;<br><i>Nostoc</i> sp.                                                                                                                                                                                                                                                                                     | NS | F  | Trophic specialist; Wild and forced feeding on<br>cyanobacteria; Life cycle                      | [164,177]     |
| <i>Setacera durani</i><br>(Cresson, 1935)                                | L      | Streams                               | Nat     | Cyanobacteria mats                                                                                                                                                                                                                                                                                                                                     | NS | Co | Inhabit colonies, mats or mass of cyanobacteria                                                  | [177]         |
| <b>Arthropoda, Hexapoda, Diptera, Tipulidae</b>                          |        |                                       |         |                                                                                                                                                                                                                                                                                                                                                        |    |    |                                                                                                  |               |
| <i>Dicranota bimaculata</i><br>(Schummel, 1829)                          | L      | Rivers                                | Nat     | <i>Tolypothrix tenuis</i> , <i>Calothrix</i><br><i>gypsophila</i> , <i>Coelosphaerium</i><br><i>kuetzingianum</i> , <i>Gomphosphaeria</i><br><i>lacustris</i>                                                                                                                                                                                          | NS | F  | Wild feeding on cyanobacteria; Gut contents analysis                                             | [160]         |
| <b>Arthropoda, Hexapoda, Ephemeroptera, Ameletiidae</b>                  |        |                                       |         |                                                                                                                                                                                                                                                                                                                                                        |    |    |                                                                                                  |               |
| <i>Ameletus similior</i><br>McDunnough, 1928                             | L      | Streams                               | Lab     | <i>Nostoc parmelioides</i>                                                                                                                                                                                                                                                                                                                             | NS | Co | Tolerance habitats abundant in cyanobacteria                                                     | [112]         |
| <b>Arthropoda, Hexapoda, Ephemeroptera, Baetidae</b>                     |        |                                       |         |                                                                                                                                                                                                                                                                                                                                                        |    |    |                                                                                                  |               |
| <i>Baetiella</i><br><i>pseudofrequenta</i><br>(Müller-Liebenau,<br>1985) | L      | Rivers                                | Nat     | <i>Calothrix</i> sp., <i>Microcystis</i> sp.,<br><i>Phormidium</i> sp.                                                                                                                                                                                                                                                                                 | NS | F  | Wild feeding on cyanobacteria; Food assimilation<br>analysis (isotope labeling)                  | [98]          |
| <i>Baetis bicaudatus</i><br>Dodds, 1923                                  | L      | Streams                               | Lab     | <i>Nostoc parmelioides</i>                                                                                                                                                                                                                                                                                                                             | NS | Co | Tolerance habitats abundant in cyanobacteria                                                     | [113]         |
| <i>Cloeon dipterum</i><br>(Linnaeus, 1761)                               | 5-6 mm | Reservoir                             | Lab+Nat | <i>Aphanizomenon</i> sp.                                                                                                                                                                                                                                                                                                                               | NS | F  | Wild feeding on cyanobacteria; Food assimilation<br>analysis (isotope labeling 13C and 15N);     | [178]         |
| <i>Procloeon venustum</i>                                                | L      | Rivers                                | Nat     | <i>Calothrix</i> sp., <i>Microcystis</i> sp.,<br><i>Phormidium</i> sp.                                                                                                                                                                                                                                                                                 | NS | F  | Wild feeding on cyanobacteria; Food assimilation<br>analysis (isotope labeling)                  | [98]          |
| <b>Arthropoda, Hexapoda, Ephemeroptera, Caenidae</b>                     |        |                                       |         |                                                                                                                                                                                                                                                                                                                                                        |    |    |                                                                                                  |               |
| <i>Caenis</i> spp.                                                       | L      | Rivers                                | Nat     | <i>Calothrix</i> sp., <i>Microcystis</i> sp.,<br><i>Phormidium</i> sp.                                                                                                                                                                                                                                                                                 | NS | F  | Wild feeding on cyanobacteria; Food assimilation<br>analysis (isotope labeling)                  | [98]          |
| <b>Arthropoda, Hexapoda, Ephemeroptera, Ephemerellidae</b>               |        |                                       |         |                                                                                                                                                                                                                                                                                                                                                        |    |    |                                                                                                  |               |
| <i>Ephemerella</i> sp.                                                   | L      | Lakes                                 | Lab     | <i>Microcystis aeruginosa</i> (+)                                                                                                                                                                                                                                                                                                                      | NS | CB | Survival/mortality                                                                               | [153]         |
| <i>Eurylophella</i> sp.                                                  | L      | Lakes                                 | Lab     | <i>Microcystis aeruginosa</i> (+)                                                                                                                                                                                                                                                                                                                      | NS | CB | Survival/mortality                                                                               | [153]         |
| <i>Caurinella idahoensis</i><br>(Allen, 1984)                            | L      | Streams                               | Nat     | <i>Nostoc parmelioides</i>                                                                                                                                                                                                                                                                                                                             | NS | Co | Tolerance habitats abundant in cyanobacteria; Inhabit<br>colonies, mats or mass of cyanobacteria | [113]         |
| <b>Arthropoda, Hexapoda, Ephemeroptera, Ephemeridae</b>                  |        |                                       |         |                                                                                                                                                                                                                                                                                                                                                        |    |    |                                                                                                  |               |
| <i>Ephemera danica</i><br>Müller, 1764                                   | L      | Streams                               | Nat     | Cyanobacteria                                                                                                                                                                                                                                                                                                                                          | NS | F  | Gut contents analysis; Harmful effect on immature<br>growth                                      | [179]         |

|                                                             |      |               |         |                                                                                                                                 |                                                                      |       |                                                                                                                               |               |
|-------------------------------------------------------------|------|---------------|---------|---------------------------------------------------------------------------------------------------------------------------------|----------------------------------------------------------------------|-------|-------------------------------------------------------------------------------------------------------------------------------|---------------|
| <i>Hexagenia spp.</i>                                       | L    | Lakes, Rivers | Nat     | Cyanobacteria blooms. <i>Microcystis aeruginosa</i>                                                                             | MC-LR                                                                | CF    | Toxin bioaccumulation; Survival/mortality; Harmful effect on reproduction, immature growth and life cycle; Toxicity synergies | [103,108,180] |
| <i>Hexagenia limbata</i> (Serville, 1829)                   | L, A | Lakes         | Nat     | <i>Microcystis aeruginosa</i> (+)                                                                                               | MC-LR, -LA, -RR, -YR                                                 | F, CF | Toxin bioaccumulation; food web toxin transfer                                                                                | [106,134,181] |
| <b>Arthropoda, Hexapoda, Ephemeroptera, Heptageniidae</b>   |      |               |         |                                                                                                                                 |                                                                      |       |                                                                                                                               |               |
| <i>Afronurus spp</i>                                        | L    | Rivers        | Nat     | <i>Calothrix</i> sp., <i>Microcystis</i> sp., <i>Phormidium</i> sp.                                                             | NS                                                                   | F     | Wild feeding on cyanobacteria; Food assimilation analysis (isotope labeling)                                                  | [98]          |
| <i>Cinygmia</i> sp.                                         | L    | Rivers        | Nat     | <i>Calothrix</i> sp., <i>Microcystis</i> sp., <i>Phormidium</i> sp.                                                             | NS                                                                   | F     | Wild feeding on cyanobacteria; Food assimilation analysis (isotope labeling)                                                  | [98]          |
| <i>Cinygmula sp</i>                                         | L    | Streams       | Lab     | <i>Nostoc parmelioides</i>                                                                                                      | NS                                                                   | Co    | Tolerance habitats abundant in cyanobacteria                                                                                  | [113]         |
| <i>Ecdyonurus angelieri</i> Thomas, 1968                    | L    | River         | Lab+Nat | Not identified                                                                                                                  | MC-LR, -LW                                                           | CF    | Survival/mortality; Bioaccumulation; Harmful effect on cells or tissue;                                                       | [120]         |
| <b>Arthropoda, Hexapoda, Ephemeroptera, Leptophlebiidae</b> |      |               |         |                                                                                                                                 |                                                                      |       |                                                                                                                               |               |
| <i>Choroterpes spp.</i>                                     | L    | Rivers        | Nat     | <i>Calothrix</i> sp., <i>Microcystis</i> sp., <i>Phormidium</i> sp.                                                             | NS                                                                   | F     | Wild feeding on cyanobacteria; Food assimilation analysis (isotope labeling)                                                  | [98]          |
| <i>Deleatidium spp.</i>                                     | L    | Streams       | Lab     | <i>Microcoleus autumnalis</i>                                                                                                   | ANTX-a, dihydroanatoxin-a and homoanatoxin-a / dihydrohomoanatoxin-a | Co    | Survival/Mortality; Toxins bioaccumulation                                                                                    | [182]         |
| <i>Paraleptophlebia sp</i>                                  | L    | Streams       | Lab     | <i>Nostoc parmelioides</i>                                                                                                      | NS                                                                   | Co    | Tolerance habitats abundant in cyanobacteria                                                                                  | [113]         |
| <b>Arthropoda, Hexapoda, Plecoptera, Capniidae</b>          |      |               |         |                                                                                                                                 |                                                                      |       |                                                                                                                               |               |
| <i>Allocaupnia granulata</i> (Claassen, 1924)               | A    | Rivers        | Nat     | Cyanobacteria                                                                                                                   | NS                                                                   | F     | Wild feeding on cyanobacteria                                                                                                 | [183,184]     |
| <i>Allocaupnia recta</i> (Claassen, 1924)                   | A    | Rivers        | Nat     | Cyanobacteria                                                                                                                   | NS                                                                   | F     | Wild feeding on cyanobacteria                                                                                                 | [183,184]     |
| <i>Allocaupnia vivipara</i> (Claassen, 1924)                | A    | Rivers        | Nat     | Cyanobacteria                                                                                                                   | NS                                                                   | F     | Wild feeding on cyanobacteria                                                                                                 | [183,184]     |
| <i>Allocaupnia mystica</i> Frison, 1929                     | A    | Rivers        | Nat     | Cyanobacteria                                                                                                                   | NS                                                                   | F     | Wild feeding on cyanobacteria                                                                                                 | [184]         |
| <i>Capnioneura mitis</i> Despax, 1932                       | A    | Rivers        | Nat     | Cyanobacteria                                                                                                                   | NS                                                                   | F     | Wild feeding on cyanobacteria; gut contents analysis                                                                          | [185]         |
| <b>Arthropoda, Hexapoda, Plecoptera, Leuctridae</b>         |      |               |         |                                                                                                                                 |                                                                      |       |                                                                                                                               |               |
| <i>Leuctra andalusiaca</i> Aubert, 1962                     | A    | River         | Nat     | Cyanobacteria                                                                                                                   | NS                                                                   | F     | Wild feeding on cyanobacteria; gut contents analysis                                                                          | [185]         |
| <i>Leuctra digitata</i> Kempny, 1899                        | L    | Rivers        | Nat     | <i>Tolypothrix tenuis</i> , <i>Calothrix gypsophila</i> , <i>Coelosphaerium kuetzingianum</i> , <i>Gomphosphaeria lacustris</i> | NS                                                                   | F     | Wild feeding on cyanobacteria; Gut contents analysis                                                                          | [160]         |



|                                                              |        |         |     |                                                                                                                                                |    |    |                                                                                |           |
|--------------------------------------------------------------|--------|---------|-----|------------------------------------------------------------------------------------------------------------------------------------------------|----|----|--------------------------------------------------------------------------------|-----------|
| <i>Leuctra franzi</i> Aubert, 1956                           | A      | River   | Nat | Cyanobacteria                                                                                                                                  | NS | F  | Wild feeding on cyanolichens; gut contents analysis                            | [185]     |
| <i>Leuctra fusca</i> (Linnaeus, 1758)                        | A, L   | River   | Nat | Cyanobacteria; <i>Tolypothrix tenuis</i> , <i>Calothrix gypsophila</i> , <i>Coelosphaerium kuetzingianum</i> , <i>Gomphosphaeria lacustris</i> | NS | F  | Wild feeding on cyanobacteria; gut contents analysis                           | [160,185] |
| <i>Leuctra geniculata</i> (Stephens, 1836)                   | L      | River   | Nat | Cyanobacteria                                                                                                                                  | NS | F  | Wild feeding on cyanobacteria; gut contents analysis; Effects on larval growth | [179]     |
| <i>Leuctra iliberis</i> Sánchez-Ortega & Alba-Tercedor, 1988 | A      | River   | Nat | Cyanobacteria                                                                                                                                  | NS | F  | Wild feeding on cyanobacteria; gut contents analysis                           | [185]     |
| <i>Leuctra inermis</i> Kempny, 1899                          | A      | River   | Nat | Cyanobacteria                                                                                                                                  | NS | F  | Wild feeding on cyanolichens; gut contents analysis                            | [185]     |
| <i>Leuctra maroccana</i> Aubert, 1956                        | A      | River   | Nat | Cyanobacteria                                                                                                                                  | NS | F  | Wild feeding on cyanobacteria; gut content sanalysis                           | [185]     |
| <i>Tyrrhenoleuctra</i> spp.                                  | L      | Rivers  | Nat | Cyanobacteria                                                                                                                                  | NS | F  | Wild feeding on cyanobacteria; gut contents analysis; Effects on larval growth | [186]     |
| Arthropoda, Hexapoda, Plecoptera, Chloroperlidae             |        |         |     |                                                                                                                                                |    |    |                                                                                |           |
| <i>Chloroperla nevada</i> Zwick, 1967                        | A      | Rivers  | Nat | Cyanobacteria                                                                                                                                  | NS | F  | Wild feeding on cyanobacteria; gut contents analysis                           | [187]     |
| <i>Isoptena serricornis</i> (Pictet, 1841)                   | A      | Rivers  | Nat | Cyanobacteria                                                                                                                                  | NS | F  | Wild feeding on cyanobacteria; gut contents analysis                           | [188]     |
| <i>Sweltsa</i> sp.                                           | L      | Streams | Lab | <i>Nostoc parmelioides</i>                                                                                                                     | NS | Co | Tolerance habitats abundant in cyanobacteria                                   | [113]     |
| Arthropoda, Hexapoda, Plecoptera, Nemouridae                 |        |         |     |                                                                                                                                                |    |    |                                                                                |           |
| <i>Amphinemura triangularis</i> (Ris, 1902)                  | A      | Rivers  | Nat | Cyanobacteria                                                                                                                                  | NS | F  | Wild feeding on cyanobacteria; gut contents analysis                           | [185]     |
| <i>Protonemura alcazaba</i> (Aubert, 1954)                   | A      | Rivers  | Nat | Cyanobacteria                                                                                                                                  | NS | F  | Wild feeding on cyanobacteria; gut contents analysis                           | [185]     |
| <i>Protonemura meyeri</i> (Pictet, 1842)                     | A      | Rivers  | Nat | Cyanobacteria                                                                                                                                  | NS | F  | Wild feeding on cyanobacteria; gut contents analysis                           | [185]     |
| <i>Nemoura cinerea</i> (Retzius, 1783)                       | A      | Rivers  | Nat | Cyanobacteria                                                                                                                                  | NS | F  | Wild feeding on cyanobacteria; gut contents analysis                           | [185]     |
| <i>Nemoura fulviceps</i> Klapálek, 1902                      | A      | Rivers  | Nat | Cyanobacteria                                                                                                                                  | NS | F  | Wild feeding on cyanobacteria; gut contents analysis                           | [185]     |
| <i>Visoka cataractae</i> (Neave, 1933)                       | larvae | Rivers  | Nat | <i>Nostoc parmelioides</i>                                                                                                                     | NS | Co | Tolerance habitats abundant in cyanobacteria                                   | [113]     |
| <i>Zapada</i> sp                                             | larvae | Rivers  | Nat | <i>Nostoc parmelioides</i>                                                                                                                     | NS | Co | Tolerance habitats abundant in cyanobacteria                                   | [113]     |
| Arthropoda, Hexapoda, Plecoptera, Peltoperlidae              |        |         |     |                                                                                                                                                |    |    |                                                                                |           |
| <i>Yoraperla</i> sp                                          | L      | Streams | Lab | <i>Nostoc parmelioides</i>                                                                                                                     | NS | Co | Tolerance habitats abundant in cyanobacteria                                   | [113]     |
| Arthropoda, Hexapoda, Plecoptera, Perlodidae                 |        |         |     |                                                                                                                                                |    |    |                                                                                |           |

[illegible]

[illegible]

|                                                      |                                                           |                             |         |  |                                                                                                                                                    |                                                          |       |                                                                                                                                                                                                                    |                     |
|------------------------------------------------------|-----------------------------------------------------------|-----------------------------|---------|--|----------------------------------------------------------------------------------------------------------------------------------------------------|----------------------------------------------------------|-------|--------------------------------------------------------------------------------------------------------------------------------------------------------------------------------------------------------------------|---------------------|
| <i>Caridina denticulata</i><br>(De Haan, 1844)       | U                                                         | Artificial pond             |         |  | <i>Microcystis aeruginosa</i> , <i>Anabaena spiroides</i> , <i>Synechocystis pevalekii</i> , <i>Aphanocapsa elachista</i> , <i>Chroococcus</i> sp. | MC-LR, -RR, -YR                                          | F     | Food assimilation analysis (isotope labeling 13C and 15C); Bioremediation (cyanobacteria control and detoxification in nature)                                                                                     | [197]               |
| <b>Arthropoda, Crustacea, Decapoda, Palaemonidae</b> |                                                           |                             |         |  |                                                                                                                                                    |                                                          |       |                                                                                                                                                                                                                    |                     |
| <i>Macrobrachium nipponensis</i> (De Haan, 1849)     | 66.5±3.5 mm length                                        | Lakes                       | Nat     |  | Cyanobacteria blooms                                                                                                                               | MC-LR, MC-RR                                             | F     | Wild feeding on cyanobacteria; Toxin Bioaccumulation and target organs; Foodweb toxin transfer; Toxin seafood problem on public health                                                                             | [99]                |
| <i>Macrobrachium rosenbergii</i> (De Man, 1879)      | 8,36-8,65 cm length and 12,92-13,87 g weight; 5-month-old | Breeding farm               | Lab     |  | <i>Microcystis aeruginosa</i> (+)                                                                                                                  | MC-LR                                                    |       | Forced feeding on cyanobacteria; Toxins bioaccumulation and target organs; Food web toxin transfer; survival/mortality; Harmfull effect on cell, tissues and molecular metabolism                                  | [100,121]           |
| <i>Palaemon modestus</i> (Heller, 1862)              | 62±4.5 mm length                                          | Lakes                       | Nat     |  | Cyanobacteria blooms                                                                                                                               | MC-LR, -RR                                               | F     | Wild feeding on cyanobacteria; Toxin Bioaccumulation; Target organs; Food web toxin transfer                                                                                                                       | [99]                |
| <i>Palaemonetes argentinus</i> Nobili, 1901          | 31.6±6.2 mm length, 0.15±0.03 g weight                    | Reservoir                   | Lab+Nat |  | Cyanobacteria blooms                                                                                                                               | MC-LR, -RR, -LA, -YR; NOD                                | CF    | Toxin bioaccumulation; Metabolic detoxification processes (stress oxidative enzymes: GST, GR, GPX and CAT)                                                                                                         | [128]               |
| <b>Arthropoda, Crustacea, Decapoda, Astacidae</b>    |                                                           |                             |         |  |                                                                                                                                                    |                                                          |       |                                                                                                                                                                                                                    |                     |
| <i>Astacus astacus</i> (Linnaeus, 1758)              | U                                                         | Lale                        |         |  | <i>Planktothrix agardhii</i> , <i>P. rubescens</i>                                                                                                 | MC-RR, -LR, -YR, -LA, -LY, -LF, -LW                      | U     | Toxins bioaccumulation; Target organs; Toxins seafood problems on public health                                                                                                                                    | [198]               |
| <i>Cherax quadricarinatus</i> (Von Martens, 1868)    | A                                                         | Breeding farm               | Lab+Nat |  | <i>Cylindrospermopsis raciborskii</i>                                                                                                              | CYN                                                      | F, CF | Wild feeding on cyanobacteria; Gut content analysis; Toxins bioaccumulation; target organs; Long-term toxin exposition analysis.                                                                                   | [122]               |
| <i>Pacifastacus leniusculus</i> (Dana, 1852)         | A (44,2 mm length and 30-19 g weight)                     | Pond and Breeding farm      | Lab+Nat |  | <i>Oscillatoria sancta</i> (+) and <i>Planktothrix agardhii</i> (+ and -)                                                                          | MCs                                                      | F     | Wild feeding on cyanobacteria; Gut contents analysis; Survival/mortality; Toxins bioaccumulation; Harmful effect on behavior and growth                                                                            | [199]               |
| <i>Paranephrops planifrons</i> White, 1842           | J                                                         | Lakes                       | Lab     |  | Cyanobacteria mats (+); <i>Microcystis</i> sp. (extracts and cells)                                                                                | MC-AR, -FR, -LA, -LR (dm-LR), -RR (dm-RR), -WR, -YR; NOD | F, CF | Forced feeding on cyanobacteria; Survival/mortality; Food assimilation analysis (isotope labeling); Toxins bioaccumulation; Target organs; Harmful effects on behavior; Toxins seafood problems on public health   | [30,200]            |
| <i>Paranephrops zealandicus</i> (White, 1847)        | U                                                         | Streams                     | Nat     |  | <i>Nostoc</i> sp.                                                                                                                                  | NS                                                       | F     | Wild feeding on cyanobacteria; Gut contents and food assimilation (isotope labeling) analysis                                                                                                                      | [87]                |
| <i>Procambarus clarkii</i> (Girard, 1852)            | L, J, A (size very variable among papers)                 | Lakes; ponds; breeding farm | Lab+Nat |  | <i>Microcystis aeruginosa</i> (+ and -); <i>Anabaena spiroides</i> ; Not identified                                                                | Extracts; MC-LR, -RR, -YR                                | F, CF | Forced feeding on cyanobacteria; Survival/mortality; Toxins bioaccumulation; Target organs; Food antioxidants and toxins blockers (astaxanthin); Harmful effect of not toxic strains cyanobacteria; Harmful effect | [32,99,123,133,201] |

|                                                         |                                          |                  |     |                                                                                                                                                                                                                                                                                                                                                                                                                                                                                                                                                                                                                                                                                                                                                                                                      |                                                                                                                                                                                                                                                                |       |                                                                                                                                                                                                                                                                                                                                              |               |  |
|---------------------------------------------------------|------------------------------------------|------------------|-----|------------------------------------------------------------------------------------------------------------------------------------------------------------------------------------------------------------------------------------------------------------------------------------------------------------------------------------------------------------------------------------------------------------------------------------------------------------------------------------------------------------------------------------------------------------------------------------------------------------------------------------------------------------------------------------------------------------------------------------------------------------------------------------------------------|----------------------------------------------------------------------------------------------------------------------------------------------------------------------------------------------------------------------------------------------------------------|-------|----------------------------------------------------------------------------------------------------------------------------------------------------------------------------------------------------------------------------------------------------------------------------------------------------------------------------------------------|---------------|--|
|                                                         |                                          |                  |     |                                                                                                                                                                                                                                                                                                                                                                                                                                                                                                                                                                                                                                                                                                                                                                                                      | on cell, tissue, and gut microbiota; Depuration; Metabolic detoxification processes (transcriptomic identification of immune and redox related DEGs); Food web toxin transfer; Toxins seafood problems on public health; New methods for detecting cyanotoxins |       |                                                                                                                                                                                                                                                                                                                                              |               |  |
| Arthropoda, Crustacea, Ostracoda, Astacidae; Cyprididae |                                          |                  |     |                                                                                                                                                                                                                                                                                                                                                                                                                                                                                                                                                                                                                                                                                                                                                                                                      |                                                                                                                                                                                                                                                                |       |                                                                                                                                                                                                                                                                                                                                              |               |  |
| Cyprinotus incongruens (Ramdohr, 1808)                  | L, J, A                                  | not indicated    | Lab | Aphanizomenon flos-aquae (-), Anabaena affinis (+), A. ambigua (-); A. baltica (+), A. catenula (-); A. circinalis (+), A. doliolum (+), A. flos-aquae (-), A. inaequalis (+), A. laza, A. levanderi (+), A. limnetica (-), A. macrospora (-), A. orientalis (-), A. randhawae, A. sphaerica (-), A. torulosa (+, -); A. variabilis (+), Chroococcus sp., Cylindrospermum doryphorum (+), Fischerella epiphytica (+), F. muscicola (+), Fremyella sp. (+), Gloeotrichia echinutata (+), Gloeotrichia sp., Microcystis aeruginosa (+, -), Nostoc coeruleum (+), N. cuticulare (+), N. pruniforme (-), N. macrosporum (-), N. rivulare (+), N. spongiaeforme (-), N. zetterstedtii (+), Nostoc sp. (-), Oscillatoria agardhii (+), O. lacustris (+), Tolypothrix distorta (+), Westiella intricata (-) | NS                                                                                                                                                                                                                                                             | F, CB | Forced feeding on cyanobacteria; Survival/mortality; Harmful effect on life cycle and behavior; Food selection analysis                                                                                                                                                                                                                      | [130]         |  |
| Dolerocypris fasciata (O.F. Müller, 1776)               | U                                        | Reservoir        | Nat | Cyanobacteria                                                                                                                                                                                                                                                                                                                                                                                                                                                                                                                                                                                                                                                                                                                                                                                        | NS                                                                                                                                                                                                                                                             | F     | Wild feeding on cyanobacteria; Life cycle                                                                                                                                                                                                                                                                                                    | [83,202]      |  |
| Mollusca, Bivalvia, Cyrenidae                           |                                          |                  |     |                                                                                                                                                                                                                                                                                                                                                                                                                                                                                                                                                                                                                                                                                                                                                                                                      |                                                                                                                                                                                                                                                                |       |                                                                                                                                                                                                                                                                                                                                              |               |  |
| Corbicula fluminea (O.F. Müller, 1774)                  | 2.1 ± 0.1 cm width, 2.01 ± 0.1 cm height | Lakes            | Nat | Microcystis sp., Anabaena sp.; Microcystis aeruginosa (+); Pseudanabaena mucicola; Nostoc sp., Anabaena cylindrica, Desmonostoc muscorum, Pseudanabaena sp.                                                                                                                                                                                                                                                                                                                                                                                                                                                                                                                                                                                                                                          | MC-RR, -LR                                                                                                                                                                                                                                                     | F     | Toxin bioaccumulation; Target organs; Toxins seafood problems on public health; Toxins digestion and bioaccessibility; Physical treatments to eliminate toxins in seafood; Bioremediation (cyanobacteria control and detoxification in nature); Selective filtration of cyanobacteria; Physiological detoxification processes (pseudofaeces) | [124,203,204] |  |
| Corbicula javanica (Mousson, 1849)                      | 23– 25 mm                                | Captive breeding | Lab | Not indicated                                                                                                                                                                                                                                                                                                                                                                                                                                                                                                                                                                                                                                                                                                                                                                                        | BMMA                                                                                                                                                                                                                                                           | CF    | Toxin bioaccumulation; Forced uptake of cyanotoxins; Physiological detoxification processes (faeces); Depuration                                                                                                                                                                                                                             | [205]         |  |

|                                                       |                       |                          |         |                                                                                                                                                                                                                                                                                                                                                                                                                   |                                      |           |                                                                                                                                                                                                                                                                                                                                                                                                                    |                                                               |
|-------------------------------------------------------|-----------------------|--------------------------|---------|-------------------------------------------------------------------------------------------------------------------------------------------------------------------------------------------------------------------------------------------------------------------------------------------------------------------------------------------------------------------------------------------------------------------|--------------------------------------|-----------|--------------------------------------------------------------------------------------------------------------------------------------------------------------------------------------------------------------------------------------------------------------------------------------------------------------------------------------------------------------------------------------------------------------------|---------------------------------------------------------------|
| <i>Corbicula leana</i> Prime, 1864                    | 2.46 ± 0.57 cm length | Captive breeding         |         | Cyanobacteria crude extracts                                                                                                                                                                                                                                                                                                                                                                                      | MC-RR, -LR, -YR                      | CF        | Toxin bioaccumulation; target organs; Metabolic detoxification processes (stress oxidative enzymes: CAT, SOD, GSTs); Depuration                                                                                                                                                                                                                                                                                    | [206]                                                         |
| <i>Corbicula sandai</i> Reinhardt, 1878               | U                     | Lakes                    | Lab+Nat | <i>Microcystis aeruginosa</i> , <i>Oscillatoria kawamurae</i> , <i>Anabaena spiroides</i>                                                                                                                                                                                                                                                                                                                         | MC-LR, -RR                           | CF, CB    | Toxin bioaccumulation; Target organs; Depuration; Field/laboratory data comparison; Food web toxin transfer                                                                                                                                                                                                                                                                                                        | [207]                                                         |
| <b>Mollusca, Bivalvia, Dreissenidae</b>               |                       |                          |         |                                                                                                                                                                                                                                                                                                                                                                                                                   |                                      |           |                                                                                                                                                                                                                                                                                                                                                                                                                    |                                                               |
| Dreissenid                                            | U                     | Lakes                    | Nat     | <i>Microcystis</i> sp.                                                                                                                                                                                                                                                                                                                                                                                            | MCs                                  | Co        | Territorial and seasonal distribution conditioned by cyanobacteria                                                                                                                                                                                                                                                                                                                                                 | [208]                                                         |
| <i>Dreissena polymorpha</i> (Pallas, 1771)            | A (15-30 mm); veliger | Lakes; Rivers; Reservoir | Lab+Nat | <i>Anabaena flos-aquae</i> (+), <i>Aphanizomenon flos-aquae</i> (-), <i>Dolichospermum lemmermanii</i> (-), <i>Gloeotrichia echinulata</i> (-), <i>Microcystis aeruginosa</i> (+, -), <i>M. wesenbergii</i> (-), <i>Planktothrix suspensa</i> (+); Not indicated                                                                                                                                                  | MCs; MC-LR, -RR, -YR, -LF; BMMA; NOD | F, CF, CB | Wild and Forced feeding/uptake on cyanobacteria; Toxins in sediments analysis; Toxins bioaccumulation; Food web toxins transfer; Metabolic detoxification processes (stress oxidative enzymes: GST, CAT, SOD); Physiological detoxification processes (faeces or pseudofaeces/pseudodiarrhoea); Depuration; Harmful effects on growth, feeding behavior, cell, tissue, molecular (DNA damage) and immune functions | [25,28,132,205,209, 210,211,212,213,214,215,216,217,218, 219] |
| <i>Dreissena rostriformis bugensis</i> Andrusov, 1897 | Veliger               | Rivers                   | Lab     | <i>Anabaena flos-aquae</i> (+), <i>Aphanizomenon flos-aquae</i> (-), <i>Dolichospermum lemmermanii</i> (-), <i>Gloeotrichia echinulata</i> (-), <i>Microcystis aeruginosa</i> (+, -), <i>M. wesenbergii</i> (-), <i>Planktothrix suspensa</i> (+)                                                                                                                                                                 | MCs                                  | CF, CB    | Forced feeding on cyanobacteria; Survival/mortality; Harmful effect of not-toxic strains;                                                                                                                                                                                                                                                                                                                          | [210]                                                         |
| <b>Mollusca, Bivalvia, Mytilidae</b>                  |                       |                          |         |                                                                                                                                                                                                                                                                                                                                                                                                                   |                                      |           |                                                                                                                                                                                                                                                                                                                                                                                                                    |                                                               |
| <i>Limnoperna fortunei</i> (Dunker, 1857)             | Veliger               | Reservoir                | Lab+Nat | cyanobacteria bloom: <i>Microcystis</i> spp.                                                                                                                                                                                                                                                                                                                                                                      | MC-LR                                | Co        | Abundance conditioned by cyanobacteria; Survival/mortality                                                                                                                                                                                                                                                                                                                                                         | [220]                                                         |
| <b>Mollusca, Bivalvia, Sphaeriidae</b>                |                       |                          |         |                                                                                                                                                                                                                                                                                                                                                                                                                   |                                      |           |                                                                                                                                                                                                                                                                                                                                                                                                                    |                                                               |
| <i>Psidium</i> sp.                                    | U                     | Lakes                    | Nat     | <i>Anabaena heterospora</i> (+), <i>A. circinalis</i> (+), <i>Aphanizomenon flos aquae</i> (+), <i>A. issatchenkoi</i> (+), <i>Aphanothece</i> sp., <i>Coelomoron</i> sp., <i>Limnotrix redekei</i> , <i>Microcystis aeruginosa</i> (+), <i>M. flos aquae</i> (+), <i>M. wesenbergii</i> (+), <i>Microcystis</i> sp. (+), <i>Planktothrix agardhii</i> (+), <i>Trichodesmium</i> sp. (+), <i>Woronichinia</i> sp. | NS                                   | F, CF, CB | Toxin bioaccumulation; Harmful effect on community structure                                                                                                                                                                                                                                                                                                                                                       | [221]                                                         |
| <i>Psidium amnicum</i> (O. F. Müller, 1774)           | U                     | Lakes                    | Nat     | <i>Anabaena heterospora</i> (+), <i>A. circinalis</i> (+), <i>Aphanizomenon flos aquae</i> (+), <i>A. issatchenkoi</i> (+), <i>Aphanothece</i> sp., <i>Coelomoron</i> sp.,                                                                                                                                                                                                                                        | NS                                   | F, CF, CB | Toxin bioaccumulation; Harmful effect on community structure                                                                                                                                                                                                                                                                                                                                                       | [221]                                                         |

|                                           |                      |                         |         |                                                                                                                          |                                                                                                                                                                                                                                                                                                                                                                                                                   |                                                      |           |                                                                                                                                                                                                                                                            |                       |
|-------------------------------------------|----------------------|-------------------------|---------|--------------------------------------------------------------------------------------------------------------------------|-------------------------------------------------------------------------------------------------------------------------------------------------------------------------------------------------------------------------------------------------------------------------------------------------------------------------------------------------------------------------------------------------------------------|------------------------------------------------------|-----------|------------------------------------------------------------------------------------------------------------------------------------------------------------------------------------------------------------------------------------------------------------|-----------------------|
|                                           |                      |                         |         |                                                                                                                          | <i>Limnotrix redekei</i> , <i>Microcystis aeruginosa</i> (+), <i>M. flos aquae</i> (+), <i>M. wesenbergii</i> (+), <i>Microcystis</i> sp. (+), <i>Planktothrix agardhii</i> (+), <i>Trichodesmium</i> sp. (+), <i>Woronichinia</i> sp.                                                                                                                                                                            |                                                      |           |                                                                                                                                                                                                                                                            |                       |
| <i>Pisidium casertanum</i> (Poli, 1791)   | U                    | Rivers                  | Nat     |                                                                                                                          | <i>Tolypothrix tenuis</i> , <i>Calothrix gypsophila</i> , <i>Coelosphaerium kuetsingianum</i> , <i>Gomphosphaeria lacustris</i>                                                                                                                                                                                                                                                                                   | NS                                                   | F         | Wild feeding on cyanobacteria; Gut contents analysis                                                                                                                                                                                                       | [160]                 |
| <i>Sphaerium corneum</i> (Linnaeus, 1758) | U                    | Lakes                   | Nat     |                                                                                                                          | <i>Anabaena heterospora</i> (+), <i>A. circinalis</i> (+), <i>Aphanizomenon flos aquae</i> (+), <i>A. issatchenkoi</i> (+), <i>Aphanothece</i> sp., <i>Coelomonon</i> sp., <i>Limnotrix redekei</i> , <i>Microcystis aeruginosa</i> (+), <i>M. flos aquae</i> (+), <i>M. wesenbergii</i> (+), <i>Microcystis</i> sp. (+), <i>Planktothrix agardhii</i> (+), <i>Trichodesmium</i> sp. (+), <i>Woronichinia</i> sp. | NS                                                   | F, CF, CB | Toxin bioaccumulation; Harmful effect on community structure                                                                                                                                                                                               | [221]                 |
| <b>Mollusca, Bivalvia, Unionidae</b>      |                      |                         |         |                                                                                                                          |                                                                                                                                                                                                                                                                                                                                                                                                                   |                                                      |           |                                                                                                                                                                                                                                                            |                       |
| <i>Anodonta anatina</i> (Linnaeus, 1758)  | U                    | Rivers                  | Nat     | Not indicated                                                                                                            |                                                                                                                                                                                                                                                                                                                                                                                                                   | MC-LR, -RR, -YR, -LA, LY, -LW, -LF, dmMC-LR, dmMC-RR | CF        | Toxin bioaccumulation (free and protein-bound); Food web toxin transfer; Toxin tracking along river system                                                                                                                                                 | [125]                 |
| <i>Anodonta cygnea</i> (Linnaeus, 1758)   | 70–90 mm             | Captive breeding; Lakes | Lab     | Not indicated; <i>Cylindrospermopsis raciborskii</i> ; <i>Aphanizomenon issatschenkoi</i> ; <i>Oscillatoria agardhii</i> |                                                                                                                                                                                                                                                                                                                                                                                                                   | BMMA; CYN; PST                                       | CF, CB    | Toxin bioaccumulation; Long-term bioaccumulation; Target organs; Forced feeding/uptake of cyanobacteria/toxins; Physiological detoxification processes (faeces); Depuration; Harmful effects on feeding behavior; Survival/mortality                       | [205,222,223,224,225] |
| <i>Anodonta grandis</i> Say, 1829         | 65–75 mm length      | Lakes                   | Lab+Nat | Not indicated                                                                                                            |                                                                                                                                                                                                                                                                                                                                                                                                                   | MC-LR                                                | CF        | Toxin bioaccumulation; Target organs; Depuration                                                                                                                                                                                                           | [226]                 |
| <i>Anodonta woodiana</i> (L. Lea, 1834)   | 130 ± 8.4 mm length  | Lakes                   | Lab     | <i>Microcystis</i> sp.                                                                                                   |                                                                                                                                                                                                                                                                                                                                                                                                                   | MC-LR, -YR, -RR                                      | F, CF     | Toxin bioaccumulation and seasonal variation; Target organs; Field/laboratory data comparison; Food assimilation analysis (isotope labeling); Toxins seafood problems on public health; Metabolic detoxification processes (oxidative stress enzymes: GST) | [227,228,229]         |
| <i>Arconaia lanceolata</i> (L. Lea, 1856) | U                    | Lakes                   | Nat     | <i>Microcystis</i> sp., <i>Anabaena</i> sp.                                                                              |                                                                                                                                                                                                                                                                                                                                                                                                                   | MCs                                                  | CF        | Toxin bioaccumulation; Target organs                                                                                                                                                                                                                       | [124]                 |
| <i>Cristaria plicata</i> (Leach, 1814)    | 240 ± 13,5 mm length | Lakes                   | Lab     | <i>Microcystis</i> sp.                                                                                                   |                                                                                                                                                                                                                                                                                                                                                                                                                   | MC-LR, -YR, -RR                                      | CF        | Toxin bioaccumulation and seasonal variation; Target organs; Field/laboratory data comparison; Food                                                                                                                                                        | [227,228,229,230,231] |

|                                                  |                              |                 |         |                                                                                                                                                                           |                                                       |       |                                                                                                                                                                                                                                                                                                              |                                                                                                                                                                                                                                             |  |
|--------------------------------------------------|------------------------------|-----------------|---------|---------------------------------------------------------------------------------------------------------------------------------------------------------------------------|-------------------------------------------------------|-------|--------------------------------------------------------------------------------------------------------------------------------------------------------------------------------------------------------------------------------------------------------------------------------------------------------------|---------------------------------------------------------------------------------------------------------------------------------------------------------------------------------------------------------------------------------------------|--|
|                                                  |                              |                 |         |                                                                                                                                                                           |                                                       |       |                                                                                                                                                                                                                                                                                                              | assimilation analysis (isotope labeling); Toxins seafood problems on public health; Metabolic detoxification processes: oxidative stress enzymes (GST) and activation of signaling pathways protects against oxidative damage (Nrf2/Keap1); |  |
| <i>Echyriddella menziesii</i> (J. E. Gray, 1843) | J (11 ± 2 mm, 0.13 ± 0.07 g) | Lakes           | Lab     | <i>Microcystis</i> sp. (extracts)                                                                                                                                         | MC-RR, -YR, -LR, -FR, -WR, -AR, -LA, dmMC-RR; dmMC-LR | CF    | Survival/Mortality; Toxins bioaccumulation; Target organs; Harmful effects on behavior                                                                                                                                                                                                                       | [30]                                                                                                                                                                                                                                        |  |
| <i>Elliptio complanata</i> (Lightfoot, 1786)     | U                            | Lakes; Ponds    | Nat     | Cyanobacteria bloom                                                                                                                                                       | MCs                                                   | F, CF | Wild feeding cyanobacteria; Toxins bioaccumulation; Target organs; Depuration                                                                                                                                                                                                                                | [232]                                                                                                                                                                                                                                       |  |
| <i>Hyriopsis cumingii</i> (I. Lea, 1852)         | 190 ± 12,4 mm length         | Lakes           | Lab     | <i>Microcystis</i> sp.; <i>Microcystis aeruginosa</i>                                                                                                                     | MC-LR, -YR, -RR                                       | CF    | Toxin bioaccumulation; Target organs; Field/laboratory data comparison; Food assimilation analysis (isotope labeling and fatty acids marking); Toxins seafood problems on public health; Metabolic detoxification processes (Antioxidant response: SOD, CAT, GPx, GST, ROS, MDA and GSH); Toxicity synergies | [129,233]                                                                                                                                                                                                                                   |  |
| <i>Lamprotula leaii</i> (J. E. Gray, 1833)       | 100 ± 6.5 mm length          | Lakes           | Lab     | <i>Microcystis</i> sp.                                                                                                                                                    | MC-LR, -YR, -RR                                       | CF    | Toxins bioaccumulation; Target organs; Field/laboratory data comparison; Food assimilation analysis (isotope labeling); Toxins seafood problems on public health; Metabolic detoxification processes (oxidative stress enzymes: GST)                                                                         | [233]                                                                                                                                                                                                                                       |  |
| <i>Lampsilis radiata</i> (Gmelin, 1791)          | U                            | Lakes; Ponds    | Nat     | Cyanobacteria bloom                                                                                                                                                       | MCs                                                   | F, CF | Wild feeding cyanobacteria; Toxins bioaccumulation; Target organs; Depuration                                                                                                                                                                                                                                | [232]                                                                                                                                                                                                                                       |  |
| <i>Leptodea ochracea</i> (Say, 1817)             | U                            | Lakes; Ponds    | Nat     | Cyanobacteria bloom                                                                                                                                                       | MCs                                                   | F, CF | Wild feeding cyanobacteria; Toxins bioaccumulation; Target organs; Depuration                                                                                                                                                                                                                                | [232]                                                                                                                                                                                                                                       |  |
| <i>Pyganodon cataracta</i> (Say, 1817)           | U                            | Lakes; Ponds    | Nat     | Cyanobacteria bloom                                                                                                                                                       | MCs                                                   | F, CF | Wild feeding cyanobacteria; Toxins bioaccumulation; Target organs; Depuration                                                                                                                                                                                                                                | [232]                                                                                                                                                                                                                                       |  |
| <i>Sinanodonta arcaeiformis</i>                  | U                            | Artificial pond |         | <i>Microcystis aeruginosa</i> , <i>Anabaena spiroides</i> , <i>Synechocystis pevalekii</i> , <i>Aphanocapsa elachista</i> , <i>Chroococcus</i> sp.                        | MC-LR, -RR, -YR                                       | F     | Food assimilation analysis (isotope labeling 13C and 15C); Bioremediation (cyanobacteria control and detoxification in nature)                                                                                                                                                                               | [232]                                                                                                                                                                                                                                       |  |
| <i>Unio douglasiae</i> J. E. Gray, 1833          | U                            | Artificial pond |         | <i>Microcystis aeruginosa</i> , <i>Microcystis</i> sp., <i>Anabena spiroides</i> , <i>Synechocystis pevalekii</i> , <i>Aphanocapsa elachista</i> , <i>Chroococcus</i> sp. | MC-LR, -RR, -YR                                       | F     | Toxin bioaccumulation and seasonal variation; Target organs; Food assimilation analysis (isotope labeling 13C and 15C); Bioremediation (cyanobacteria control and detoxification in nature); Depuration; Toxins seafood problems on public health                                                            | [197,228,229,234]                                                                                                                                                                                                                           |  |
| <i>Unio pictorum</i> (Linnaeus, 1758)            | 70–89 mm length              | Reservoir       | Lab+Nat | <i>Aphanizomenon flos-aquae</i> (90%), <i>Microcystis aeruginosa</i> (10%)                                                                                                | MC-LR, -YR, -RR; ANTX-a,                              | CF    | survival/mortality; Harmful effect on immature (embryos) and physiology (heart tolerance, heart rate and its recovery); Toxicity synergies                                                                                                                                                                   | [178]                                                                                                                                                                                                                                       |  |



|                                                         |                    |                     |     |                                                                                                                                                                                                                                                                                                                                                                                                                                                                                                                                                                                                                                                                                                                                                                                                 |                             |           |                                                                                                                                                                                                                                                                   |               |
|---------------------------------------------------------|--------------------|---------------------|-----|-------------------------------------------------------------------------------------------------------------------------------------------------------------------------------------------------------------------------------------------------------------------------------------------------------------------------------------------------------------------------------------------------------------------------------------------------------------------------------------------------------------------------------------------------------------------------------------------------------------------------------------------------------------------------------------------------------------------------------------------------------------------------------------------------|-----------------------------|-----------|-------------------------------------------------------------------------------------------------------------------------------------------------------------------------------------------------------------------------------------------------------------------|---------------|
| <i>Unio tumidus</i><br>Philipsson, 1788                 | 50–90 mm<br>length | Lakes               | Lab | <i>Microcystis aeruginosa</i> (extracts);<br>Not indicated                                                                                                                                                                                                                                                                                                                                                                                                                                                                                                                                                                                                                                                                                                                                      | MC-LR,<br>extracts;<br>BMMA | F, CF     | Wild feeding in cyanobacteria; Toxins bioaccumulation;<br>Metabolic detoxification processes (stress oxidative<br>enzymes: GST, CAT, SOD); Physiological detoxification<br>processes (faeces); Depuration; Food assimilation<br>analysis (fatty acids biomarkers) | [205,211,215] |
| <b>Mollusca, Gastropoda, Heterobanchia, Physidae</b>    |                    |                     |     |                                                                                                                                                                                                                                                                                                                                                                                                                                                                                                                                                                                                                                                                                                                                                                                                 |                             |           |                                                                                                                                                                                                                                                                   |               |
| <i>Aplexa hypnorum</i><br>(Linnaeus, 1758)              | U                  | Lakes               | Nat | <i>Anabaena heterospora</i> (+), <i>A. circinalis</i> (+), <i>Aphanizomenon flos aquae</i> (+), <i>A. issatchenkoi</i> (+), <i>Aphanothece</i> sp., <i>Coelomoron</i> sp., <i>Limnatrix redekei</i> , <i>Microcystis aeruginosa</i> (+), <i>M. flos aquae</i> (+), <i>M. wesenbergii</i> (+), <i>Microcystis</i> sp. (+), <i>Planktothrix agardhii</i> (+), <i>Trichodesmium</i> sp. (+), <i>Woronichinia</i> sp.                                                                                                                                                                                                                                                                                                                                                                               | NS                          | Co        | Toxin bioaccumulation; Harmful effect on community structure                                                                                                                                                                                                      | [221]         |
| <i>Physa acuta</i><br>Draparnaud, 1805                  | J, A               | Reservoir;<br>Lakes | Nat | <i>Anabaena</i> sp., <i>Aphanizomenon</i> sp., <i>Microcystis</i> sp., <i>Planktothrix</i> sp., <i>Trichodesmium</i> sp.; Patches of periphyton: <i>Phormidium</i> sp./ <i>Oscillatoria</i> sp.; <i>Anabaena flos-aquae</i> (+), <i>Anabaena planktonica</i> , <i>A. spiroides</i> (+), <i>Aphanizomenon flos-aquae</i> , <i>A. gracile</i> , <i>Aphanocapsa</i> sp., <i>Aphanothece</i> sp., <i>Coelomoron</i> sp., <i>Coelosphaerium</i> sp., <i>Limnathrix redekei</i> , <i>Merismopedia</i> sp., <i>Microcystis aeruginosa</i> (+), <i>M. flos-aquae</i> (+), <i>Microcystis wesenbergii</i> (+), <i>Oscillatoria</i> sp. (+), <i>Plankthotrix agardhii</i> (+), <i>Pseudanabaena catenata</i> , <i>P. limnetica</i> , <i>Spirulina</i> sp. <i>Synechococcus</i> sp., <i>Woronichia</i> sp. | MCs                         | F, CF, Co | Seasonal abundance and maturation; Toxins bioaccumulation related with season; Target organs; Toxicity synergies; Inhabit mats (periphyton) of cyanobacteria; Territorial and seasonal distribution conditioned by cyanobacteria                                  | [78,191,235]  |
| <i>Physa gyrina</i> Say, 1821                           | U                  | Lakes               | Nat | <i>Microcystis aeruginosa</i>                                                                                                                                                                                                                                                                                                                                                                                                                                                                                                                                                                                                                                                                                                                                                                   | MC-LR                       | CF, CB    | Toxin bioaccumulation                                                                                                                                                                                                                                             | [236,237]     |
| <b>Mollusca, Gastropoda, Heterobanchia, Planorbidae</b> |                    |                     |     |                                                                                                                                                                                                                                                                                                                                                                                                                                                                                                                                                                                                                                                                                                                                                                                                 |                             |           |                                                                                                                                                                                                                                                                   |               |
| <i>Ancylus fluviatilis</i> (O.F. Müller, 1774)          | J, A               | Reservoir           | Nat | Most frequent genera in study area: <i>Anabaena</i> sp., <i>Aphanizomenon</i> sp., <i>Microcystis</i> sp., <i>Planktothrix</i> sp., <i>Trichodesmium</i> sp.                                                                                                                                                                                                                                                                                                                                                                                                                                                                                                                                                                                                                                    | MCs                         | F, CF     | Toxin bioaccumulation; Harmful effect on community structure                                                                                                                                                                                                      | [78,221]      |
| <i>Armiger crista</i><br>(Linnaeus, 1758)               | U                  | Lakes               | Nat | <i>Anabaena heterospora</i> (+), <i>A. circinalis</i> (+), <i>Aphanizomenon flos aquae</i> (+), <i>Microcystis flos aquae</i> (+),                                                                                                                                                                                                                                                                                                                                                                                                                                                                                                                                                                                                                                                              | NS                          | F, CF, CB | Toxin bioaccumulation; Harmful effect on community structure                                                                                                                                                                                                      | [221]         |

|                                                        |                                           |                         |     |                                                                                                                                                                                                                                                                                                                                                                                                                                                                                                                                                                                                                                                                                                                                                                                                                                                                |                                |           |                                                                                                                                                                                                                                                                                                                  |                                                   |
|--------------------------------------------------------|-------------------------------------------|-------------------------|-----|----------------------------------------------------------------------------------------------------------------------------------------------------------------------------------------------------------------------------------------------------------------------------------------------------------------------------------------------------------------------------------------------------------------------------------------------------------------------------------------------------------------------------------------------------------------------------------------------------------------------------------------------------------------------------------------------------------------------------------------------------------------------------------------------------------------------------------------------------------------|--------------------------------|-----------|------------------------------------------------------------------------------------------------------------------------------------------------------------------------------------------------------------------------------------------------------------------------------------------------------------------|---------------------------------------------------|
|                                                        |                                           |                         |     | <i>M. viridis</i> (+), <i>Oscillatoria</i> sp. (+), <i>Planktothrix agardhii</i> (+)                                                                                                                                                                                                                                                                                                                                                                                                                                                                                                                                                                                                                                                                                                                                                                           |                                |           |                                                                                                                                                                                                                                                                                                                  |                                                   |
| <i>Gyraulus albus</i> (O. F. Müller, 1774)             | U                                         | Lakes                   | Nat | <i>Anabaena heterospora</i> (+), <i>A. circinalis</i> (+), <i>Aphanizomenon flos aquae</i> (+), <i>A. issatchenkoi</i> (+), <i>Aphanothece</i> sp., <i>Coelomorion</i> sp., <i>Limnotrix redekei</i> , <i>Microcystis aeruginosa</i> (+), <i>M. flos aquae</i> (+), <i>M. wesenbergii</i> (+), <i>Microcystis</i> sp. (+), <i>Planktothrix agardhii</i> (+), <i>Trichodesmium</i> sp. (+), <i>Woronichinia</i> sp.                                                                                                                                                                                                                                                                                                                                                                                                                                             | NS                             | F, CF, CB | Toxin bioaccumulation; Harmful effect on community structure                                                                                                                                                                                                                                                     | [221]                                             |
| <i>Helisoma trivolvis</i> (Say, 1817)                  | U                                         | Lakes                   | Nat | <i>Microcystin aeruginosa</i>                                                                                                                                                                                                                                                                                                                                                                                                                                                                                                                                                                                                                                                                                                                                                                                                                                  | MC-LR                          | CF, CB    | Toxin bioaccumulation                                                                                                                                                                                                                                                                                            | [236,237]                                         |
| <i>Hippeutis complanatus</i> (Linnaeus, 1758)          | J, A                                      | Reservoir               | Nat | Most frequent genera in study area: <i>Anabaena</i> sp., <i>Aphanizomenon</i> sp., <i>Microcystis</i> sp., <i>Planktothrix</i> sp., <i>Trichodesmium</i> sp.                                                                                                                                                                                                                                                                                                                                                                                                                                                                                                                                                                                                                                                                                                   | MCs                            | F, CF     | Toxin bioaccumulation; Harmful effect on community structure                                                                                                                                                                                                                                                     | [78,221]                                          |
| <i>Planorbis planorbis</i> (Linnaeus, 1758)            | J, A                                      | Reservoir               | Nat | Most frequent genera in study area: <i>Anabaena</i> sp., <i>Aphanizomenon</i> sp., <i>Microcystis</i> sp., <i>Planktothrix</i> sp., <i>Trichodesmium</i> sp.; <i>Anabaena flos-aquae</i> (+), <i>A. planktonica</i> , <i>A. spiroides</i> (+), <i>A. heterospora</i> (+), <i>A. circinalis</i> (+), <i>Aphanizomenon flos-aquae</i> , <i>A. gracile</i> , <i>A. issatchenkoi</i> (+), <i>Aphanocapsa</i> sp., <i>Aphanothece</i> sp., <i>Coelomorion</i> sp., <i>Coelosphaerium</i> sp., <i>Limnotrix redekei</i> , <i>Merismopedia</i> sp., <i>Microcystis aeruginosa</i> (+), <i>M. flos-aquae</i> (+), <i>M. wesenbergii</i> (+), <i>Oscillatoria</i> sp. (+), <i>Plankthotrix agardhii</i> (+), <i>Pseudanabaena catenata</i> , <i>P. limnetica</i> , <i>Spirulina</i> sp. <i>Synechococcus</i> sp., <i>Trichodesmium</i> sp. (+), <i>Woronichinia</i> sp. | MCs                            | F, CF     | Toxin bioaccumulation; Territorial and seasonal distribution conditioned by cyanobacteria; Harmful effect on community structure                                                                                                                                                                                 | [78,221,235]                                      |
| <b>Mollusca, Gastropoda, Heterobanchia, Lymnaeidae</b> |                                           |                         |     |                                                                                                                                                                                                                                                                                                                                                                                                                                                                                                                                                                                                                                                                                                                                                                                                                                                                |                                |           |                                                                                                                                                                                                                                                                                                                  |                                                   |
| <i>Lymnaea stagnalis</i> (Linnaeus, 1758)              | J (14 ± 1 mm length), A (25-50 mm height) | Captive breeding; lakes | Lab | <i>Planktothrix agardhii</i> (+, -); <i>Anabaena flos-aquae</i> (+), <i>A. planktonica</i> , <i>A. spiroides</i> (+), <i>Aphanizomenon flos-aquae</i> , <i>A. gracile</i> , <i>Aphanocapsa</i> sp., <i>Aphanothece</i> sp., <i>Coelomorion</i> sp.,                                                                                                                                                                                                                                                                                                                                                                                                                                                                                                                                                                                                            | MC-RR, dmMC-RR, dmMc-LR, MC-YR | F, CF, CB | Forced feeding on cyanobacteria; Food selection analysis; Toxin bioaccumulation (free and covalently bound); Target organs; Depuration; Physiological detoxification processes (egestion); Metabolic detoxification processes (stress oxidative enzymes: GST and CAT); Harmful effects on life cycle, embryo and | [235,236,237,238,239,240,241,242,243,244,245,246] |

[illegible]

|                                                           |                                              |           |         |                                                                                                                                                                                                                                                                                                                                                                                                                                                                                                                                                                                   |                |           |                                                                                                                                                                                                                                                                                                                           |                      |
|-----------------------------------------------------------|----------------------------------------------|-----------|---------|-----------------------------------------------------------------------------------------------------------------------------------------------------------------------------------------------------------------------------------------------------------------------------------------------------------------------------------------------------------------------------------------------------------------------------------------------------------------------------------------------------------------------------------------------------------------------------------|----------------|-----------|---------------------------------------------------------------------------------------------------------------------------------------------------------------------------------------------------------------------------------------------------------------------------------------------------------------------------|----------------------|
| <i>Valvata cristata</i> O. F. Müller, 1774                | U                                            | Lakes     | Nat     | <i>Anabaena flos-aquae</i> (+), <i>A. planktonica</i> , <i>A. spiroides</i> (+), <i>Aphanizomenon flos-aquae</i> , <i>A. gracile</i> , <i>Aphanocapsa</i> sp., <i>Aphanothece</i> sp., <i>Coelomorion</i> sp., <i>Coelosphaerium</i> sp., <i>Limnathrix redekei</i> , <i>Merismopedia</i> sp., <i>Microcystis aeruginosa</i> (+), <i>M. flos-aquae</i> (+), <i>M. wesenbergii</i> (+), <i>Oscillatoria</i> sp. (+), <i>Plankthotrix agardhii</i> (+), <i>Pseudanabaena catenata</i> , <i>P. limnetica</i> , <i>Spirulina</i> sp., <i>Synechococcus</i> sp., <i>Woronichia</i> sp. | MCs            | U         | Toxin bioaccumulation: Territorial and seasonal distribution conditioned by cyanobacteria                                                                                                                                                                                                                                 | [235]                |
| <b>Mollusca, Gastropoda, Caenogastropoda, Bythiniidae</b> |                                              |           |         |                                                                                                                                                                                                                                                                                                                                                                                                                                                                                                                                                                                   |                |           |                                                                                                                                                                                                                                                                                                                           |                      |
| <i>Bithynia tentaculata</i> (Linnaeus, 1758)              | J, A                                         | Reservoir | Nat     | Most frequent genera in study area: <i>Anabaena</i> sp., <i>Aphanizomenon</i> sp., <i>Microcystis</i> sp., <i>Plankthotrix</i> sp., <i>Trichodesmium</i> sp.; <i>Anabaena heterospora</i> (+), <i>Anabaena circinalis</i> (+), <i>Aphanizomenon flos aquae</i> (+), <i>Aphanothece</i> sp., <i>Coelomorion</i> sp., <i>Limnathrix redekei</i> , <i>Microcystis aeruginosa</i> (+), <i>M. flos aquae</i> (+), <i>M. wesenbergii</i> (+), <i>Microcystis</i> sp. (+), <i>Plankthotrix agardhii</i> (+), <i>Woronichinia</i> sp.                                                     | MCs            | F, CF     | Toxin bioaccumulation; Harmful effects on community structure                                                                                                                                                                                                                                                             | [78,221]             |
| <b>Mollusca, Gastropoda, Caenogastropoda, Baicaliidae</b> |                                              |           |         |                                                                                                                                                                                                                                                                                                                                                                                                                                                                                                                                                                                   |                |           |                                                                                                                                                                                                                                                                                                                           |                      |
| <i>Maackia herderiana</i> (Lindholm, 1909)                | U                                            | Lakes     | Lab+Nat | <i>Lyngbya limnetica</i>                                                                                                                                                                                                                                                                                                                                                                                                                                                                                                                                                          | NS             | F         | Wild and forced feeding on cyanobacteria; Gut contents analysis; Food assimilation analysis (isotope labeling)                                                                                                                                                                                                            | [248]                |
| <b>Mollusca, Gastropoda, Caenogastropoda, Tateidae</b>    |                                              |           |         |                                                                                                                                                                                                                                                                                                                                                                                                                                                                                                                                                                                   |                |           |                                                                                                                                                                                                                                                                                                                           |                      |
| <i>Potamopyrgus antipodarum</i> (J. E. Gray, 1843)        | J (2 ± 0.2 mm length), A (4 ± 0.2 mm length) | River     | Lab+Nat | Patches of periphyton: <i>Phormidium</i> sp./ <i>Oscillatoria</i> sp.; <i>Plankthotrix agardhii</i> (+); <i>Anabaena flos-aquae</i> (+), <i>A. planktonica</i> , <i>A. heterospora</i> (+), <i>A. circinalis</i> (+), <i>A. spiroides</i> (+), <i>Aphanizomenon flos-aquae</i> , <i>A. gracile</i> , <i>Aphanocapsa</i> sp., <i>Aphanothece</i> sp., <i>Coelomorion</i> sp., <i>Coelosphaerium</i> sp., <i>Merismopedia</i> sp., <i>Microcystis aeruginosa</i> (+), <i>M. flos-aquae</i> (+), <i>M. wesenbergii</i> (+), <i>Oscillatoria</i> sp. (+), <i>Plankthotrix</i>         | NS; MC-RR, -LR | F, CF, Co | Inhabit mats (periphyton) of cyanobacteria; Territorial and seasonal distribution conditioned by cyanobacteria; forced feeding on cyanobacteria; Toxins bioaccumulation; Survival/mortality; Harmful effects on life cycle, immature growth, fecundity, Community structure; Depuration; Field/laboratory data comparison | [78,221,235,249,250] |

|                                                                               |                                                             |           |         |                                                                                                                                             |                 |           |                                                                                                                                                                                                                        |                   |  |
|-------------------------------------------------------------------------------|-------------------------------------------------------------|-----------|---------|---------------------------------------------------------------------------------------------------------------------------------------------|-----------------|-----------|------------------------------------------------------------------------------------------------------------------------------------------------------------------------------------------------------------------------|-------------------|--|
|                                                                               |                                                             |           |         | agardhii (+), Trichodesmium sp. (+),<br>Pseudanabaena catenata, P.<br>limnetica, Spirulina sp.,<br>Synechococcus sp., Woronichia sp.        |                 |           |                                                                                                                                                                                                                        |                   |  |
| Mollusca, Gastropoda, Caenogastropoda, Thiaridae                              |                                                             |           |         |                                                                                                                                             |                 |           |                                                                                                                                                                                                                        |                   |  |
| Melanoides tuberculata (O. F. Müller, 1774)                                   | U                                                           | waterways | Lab     | Extracts of Cylindrospermopsis raciborskii (+)                                                                                              | CYN; deoxy-CYN  | CF, CB    | Toxin bioaccumulation and bioconcentration                                                                                                                                                                             | [251]             |  |
| Mollusca, Gastropoda, Caenogastropoda, Viviparidae                            |                                                             |           |         |                                                                                                                                             |                 |           |                                                                                                                                                                                                                        |                   |  |
| Bellamya aeruginosa (Reeve, 1863)                                             | 13.36-16.39 mm (width), 21.64-27.58 mm (height); offsprings | Lakes     | Nat     | Cyanobacterial blooms (mainly composed of Microcystis aeruginosa and Anabaena spiroides)                                                    | MC-LR, -RR, -YR | F, CF, CB | Toxin bioaccumulation and seasonal and spatial dynamics; Target organs; Food web toxin transfer; Toxins seafood problems on public health; Toxicity synergies; Harmful effect on off springs                           | [227,252,253,254] |  |
| Margarya melanioides G. Nevill, 1877                                          | 47.0 x 39.0 mm in size                                      | Lakes     | Lab+Nat | Not identified                                                                                                                              | MCs             |           | Toxin bioaccumulation; Target organs; Toxins seafood problems on public health; Field/laboratory data comparison                                                                                                       | [247]             |  |
| Sinotaia histrica (A. Gould, 1859)                                            | U                                                           | Lakes     | Lab+Nat | Microcystis aeruginosa, Oscillatoria kawamurae, Anabaena spiroides; Microcystis. wesenbergii, M. ichthyoblabe and Aphanizomenon flos-aquae. | MC-LR, -RR      | CF, CB    | Toxin bioaccumulation; Target organs; Depuration; Field/laboratory data comparison; Food web toxin transfer; Harmful effect on fecundity, abundance, cell and tissue; Food antioxidants and toxins blockers (naringin) | [207,255,256]     |  |
| Viviparus viviparus (Linnaeus, 1758)                                          | U                                                           | Rivers    | Nat     | Tolypothrix tenuis, Calothrix gypsophila, Coelosphaerium kuetzingianum, Gomphosphaeria lacustris                                            | NS              | F         | Wild feeding on cyanobacteria; Gut contents analysis                                                                                                                                                                   | [160]             |  |
| Annelida, Clitellata, Hirudinea                                               |                                                             |           |         |                                                                                                                                             |                 |           |                                                                                                                                                                                                                        |                   |  |
| Hirudinidae                                                                   | U                                                           | Lakes     | Nat     | Cyanobacteria bloom: Microcystis sp.                                                                                                        | NS              | CF, CB    | Tolerance to habitats abundant in cyanobacteria; Cyanobacteria bloom; Abundance of macroinvertebrates and cyanobacteria directly proportional                                                                          | [143]             |  |
| Annelida, Clitellata, Tubificida                                              |                                                             |           |         |                                                                                                                                             |                 |           |                                                                                                                                                                                                                        |                   |  |
| Limnodilus hoffineisteri (probably Limnodrilus hoffmeisteri (Claparède, 1862) | U                                                           | Lakes     | Nat     | Microcystis sp., Anabaena sp.                                                                                                               | MC-LR, -RR, -YR | CF        | Toxin bioaccumulation                                                                                                                                                                                                  | [97,124]          |  |
| Stylaria lacustris (Linnaeus, 1767)                                           | U                                                           | Rivers    | Nat     | Tolypothrix tenuis, Calothrix gypsophila, Coelosphaerium kuetzingianum, Gomphosphaeria lacustris                                            | NS              | F         | Wild feeding on cyanobacteria; Gut contents analysis                                                                                                                                                                   | [160]             |  |
| Stylodrilus heringianus Claparede, 1862                                       | U                                                           | Rivers    | Nat     | Tolypothrix tenuis, Calothrix gypsophila, Coelosphaerium                                                                                    | NS              | F         | Wild feeding on cyanobacteria; Gut contents analysis                                                                                                                                                                   | [160]             |  |

|                                                        |   |               |     |                                                                                                                                                                                         |                                                                 |        |                                                                                                                                                                                         |
|--------------------------------------------------------|---|---------------|-----|-----------------------------------------------------------------------------------------------------------------------------------------------------------------------------------------|-----------------------------------------------------------------|--------|-----------------------------------------------------------------------------------------------------------------------------------------------------------------------------------------|
| <i>kuetzingianum</i> , <i>Gomphosphaeria lacustris</i> |   |               |     |                                                                                                                                                                                         |                                                                 |        |                                                                                                                                                                                         |
| Tubificids                                             | U | Lakes         | Nat | Cyanobacteria bloom: <i>Microcystis</i> sp.                                                                                                                                             | NS                                                              | CF, CB | Tolerance to habitats abundant in cyanobacteria; Cyanobacteria bloom; Abundance of macroinvertebrates and cyanobacteria directly proportional [143]                                     |
| <b>Platyhelminthes, Tricladida</b>                     |   |               |     |                                                                                                                                                                                         |                                                                 |        |                                                                                                                                                                                         |
| <i>Dugesia tigrina</i> (Girard, 1850)                  | U | Rivers        |     | <i>Pseudanabaena limnetica</i> ; <i>Microcystis aeruginosa</i> , <i>M. wessenbergii</i> , <i>Dolichospermum flos-aquae</i> , <i>Planktothrix agardhii</i> , <i>Oscillatoria angusta</i> | ANA, CYN, NOD, MC-RR, -LR, -LF, -LY, -LW, -YR, dmMC-RR; dmMC-LR | CF     | Survival/mortality test [257]                                                                                                                                                           |
| <b>Macroinvertebrate community</b>                     |   |               |     |                                                                                                                                                                                         |                                                                 |        |                                                                                                                                                                                         |
| Macroinvertebrates community                           | L | Lakes, Rivers | Nat | Cyanobacteria: bloom ( <i>Microcystis</i> sp); Algae community structure ( <i>Nostoc</i> spp., <i>Phormidium</i> sp., <i>Microcoleus</i> sp.); Oncoids                                  | NS                                                              | CF, Co | Effects on abundance, diversity, and assemblage of macroinvertebrate community; Inhabit colonies, mats, or mass of cyanobacteria; Establishment of exclusive food web [119,145,258,259] |
